# Supplementary material
Source: PubMed Central journal article supplement (PMC9749406)
Supplement: NIHMS1853890-supplement-Supporting_Information.pdf [file NIHMS1853890-supplement-Supporting_Information.pdf]

Supporting Information for

**Trimer-to-monomer disruption mechanism for a potent, protease-resistant  
antagonist of Tumor Necrosis Factor- $\alpha$  Signaling**

Jiani Niu,<sup>1</sup> Annika J. Cederstrand,<sup>1</sup> Geoffrey A. Eddinger,<sup>1</sup> Boyu Yin,<sup>1</sup> James W. Checco,<sup>1,‡</sup>  
Craig A. Bingman,<sup>2</sup> Victor K. Outlaw,<sup>1,†</sup> Samuel H. Gellman<sup>\*,1</sup>

<sup>1</sup>Department of Chemistry, University of Wisconsin-Madison, Madison, Wisconsin 53706, USA.

<sup>2</sup>Department of Biochemistry, University of Wisconsin-Madison, Madison, Wisconsin 53706,  
USA.

\*Correspondence should be addressed to S.H.G. (gellman@chem.wisc.edu)

## I. Materials and Instrumentations

### 1). Material Sources

| Reagent or Material                                 | Vendor          | Catalog No.      |
|-----------------------------------------------------|-----------------|------------------|
| <b>SPPS Chemicals and Materials</b>                 |                 |                  |
| $\alpha$ -N-Fmoc-amino acids                        | Chem Impex      | Various          |
| Fmoc $\beta$ 3-amino acids                          | PepTech         | Various          |
| Fmoc-(1S,2S)-2-ACPC-OH                              | Chem Impex      | 15073            |
| Fmoc-aminoisobutyric acid                           | Chem Impex      | 02547            |
| Dodecanoic acid                                     | Millipore Sigma | L4250            |
| Fmoc-NH-PEG8-CH2-CH2-COOH                           | ChemPep         | 280112           |
| SPPS reaction vessel syringes/caps                  | Torviq          | SF-1000/PC-SF    |
| $\alpha$ -Cyano-4-hydroxycinnamic acid (CHCA)       | Millipore Sigma | 70990            |
| N, N Dimethylformamide (DMF) ACS-grade              | Millipore Sigma | 319937           |
| N, N Dimethylformamide (DMF) biotech-grade          | Millipore Sigma | 494488           |
| Piperidine                                          | Millipore Sigma | 104094           |
| Trifluoroacetic acid (TFA)                          | Millipore Sigma | T6508            |
| 1,2 ethanedithiol                                   | Millipore Sigma | 2390             |
| Thioanisole                                         | Millipore Sigma | T28002           |
| N,N'-Diisopropylcarbodiimide (DIC)                  | Chem Impex      | 00110            |
| Ethyl (hydroxyimino) cyanoacetate (Oxyma)           | Chem Impex      | 26426            |
| Rink Amide Resin (Low Loading)                      | CEM             | R002             |
| Acetonitrile                                        | Millipore Sigma | 34851            |
| Triisopropylsilane                                  | Millipore Sigma | 233781           |
| <b>Protein Expression and Purification Reagents</b> |                 |                  |
| BL21 (DE3) Competent <i>E. coli</i>                 | NEB             | C2527            |
| S.O.C. Medium                                       | Thermo Fisher   | 15544034         |
| Plasmid (GST-TEV-TNF $\alpha$ )                     | Gene Universal  | Customized order |
| TEV protease Plasmid (gift from David Waugh)        | Addgene         | pDZ2087          |
| Tryptone                                            | Dot Scientific  | SD149182         |
| Yeast Extract                                       | Dot Scientific  | DS149162         |
| NaCl                                                | Millipore Sigma | S9888            |
| Tris base                                           | Millipore Sigma | 77861            |
| 2-mercaptoethanol (BME)                             | Millipore Sigma | 444203           |
| L-Arginine                                          | Millipore Sigma | A5006            |
| L-Glutathione reduced                               | Millipore Sigma | G4251            |
| L-Glutathione oxidized                              | Millipore Sigma | G4376            |
| Sodium phosphate dibasic                            | Millipore Sigma | S9763            |
| Potassium phosphate monobasic                       | Millipore Sigma | P0662            |
| TWEEN-20                                            | Millipore Sigma | P1379            |

| <b>Protein Crystallography Reagents and Materials</b> |                   |             |
|-------------------------------------------------------|-------------------|-------------|
| Index crystallization screen                          | Hampton Research  | HR2-144     |
| Crystal Screen crystallization screen                 | Hampton Research  | HR2-110/112 |
| PEGRx HT                                              | Hampton Research  | HR2-086     |
| PEG/Ion 400                                           | Hampton Research  | HR2-460     |
| crystallization accessories                           | Hampton Research  | various     |
| <b>ELISA Reagents and Materials</b>                   |                   |             |
| Recombinant hTNF- $\alpha$                            | R&D systems       | 210-TA      |
| Recombinant hTNFR1                                    | R&D systems       | 636-R1-025  |
| Streptavidin-Alkaline Phosphatase                     | R&D systems       | AR001       |
| hTNF- $\alpha$ Biotinylated Antibody                  | R&D systems       | BAF210      |
| SIGMAFAST p-Nitrophenyl phosphate tablets             | Millipore Sigma   | N1891       |
| Nunc MaxiSorp Flat-bottom Plate                       | Invitrogen        | 44-2402-21  |
| PBS-TWEEN Tablets                                     | Millipore Sigma   | 524653      |
| BSA(7.5%)                                             | Thermo Fisher     | 15260037    |
| DPBS                                                  | Millipore Sigma   | D8537       |
| <b>Cell Assay Reagents and Materials</b>              |                   |             |
| WEHI-13VAR cell line                                  | ATCC              | CRL-2148    |
| RPMI-1640 Medium                                      | ATCC              | 30-2001     |
| Actinomycin D                                         | Thermo Fisher     | BP-606      |
| Fetal bovine serum (FBS)                              | Millipore Sigma   | F2442       |
| penicillin/streptomycin                               | HyClone           | SV30010     |
| Trypsin EDTA (0.05%)                                  | Corning           | 25-051-CI   |
| White 96-well plate                                   | Corning           | 3610        |
| <b>CellTiter-Glo luminescent cell viability assay</b> | Promega           | G7571       |
| <b>Software and Illustrations</b>                     |                   |             |
| GraphPad Prism 8                                      | GraphPad Software |             |
| Origin 7                                              | Origin Software   |             |
| PyMOL                                                 | Schrodinger       |             |
| Chimera                                               | UCSF              |             |
| Coot                                                  |                   |             |
| Phenix                                                |                   |             |
| CCP4                                                  |                   |             |

## 2) Instrumentation Acknowledgments

Crystallization and structure solution were supported by the Collaborative Crystallography Core in the Department of Biochemistry, UW-Madison.

ITC data were obtained at the University of Wisconsin – Madison Biophysics Instrumentation Facility, which was established with support from the University of Wisconsin – Madison and grants BIR-9512577 (NSF) and S10 RR13790 (NIH).

Bruker microflex LRF, MALDI-TOF-MS, Generous gift from the Bender Fund

Bruker Advance III-400, NMR Spectrometer, NSF CHE-1048642 2010

## II. Methods

### 1) Peptide synthesis, purification, and characterization

Fmoc-(3S,4R)-4-aminopyrrolidine acid (Fmoc-APC-OH) was synthesized as previously reported.<sup>1</sup> Rink Amide ProTide resin (LL) was added to a Torviq solid-phase peptide synthesis vessel with a stir bar. The resin was swelled in 50:50 DCM:DMF for 15 minutes before the reactions were started. Fmoc amino acids (4 eq., 0.1M) were activated with OXYMA (8 eq.), and DIC (4 eq.) and added to the reaction vessel. Regular coupling cycles were done at 70°C for 4 minutes. The difficult amino acids (Leu, Ile, Val,  $\beta$ -amino acids) were extended (for 8 to 12 minutes) or double coupled. Histidine was coupled at 50°C for 10 minutes to avoid racemization. Then the resin was washed 5 times with DMF. The Fmoc protecting group was removed by combining the resin with 20% v/v piperidine in DMF at 80°C for 2 minutes. To the deprotection solution, 0.1M OXYMA was added to limit aspartimide formation. To append the di-dodecanoyl group, Fmoc-Lys(Fmoc)-OH was first coupled to the N-term after the PEG linker. After deprotecting the two Fmoc groups on the N-term Lys residue, decanoic acid (8 eq.) was activated and coupled with regular coupling condition.

After the sequence was completed, cleavage was performed by mixing the resin with 1% TIPS, 2.5% water, 2.5% EDT, 2.5% thioanisole, and 91.5% TFA at room temperature for 4 hours. Crude cleaved peptide was drained from the reaction vessel into a 50-mL falcon tube. Excess TFA was evaporated under a stream of nitrogen, and about 40 mL of cold diethyl ether was added to precipitate the peptide. The peptide pellet was collected by centrifuging at 3500 g for 5 minutes. The pellet was dried under nitrogen and dissolved in DMSO (8mL per 50  $\mu$ mol). NH<sub>4</sub>OH (50 drops per 50  $\mu$ mol) was added to adjust the pH for disulfide bond formation. The mixture was stirred at room temperature for at least 3 days.

Oxidized peptide was then filtered through a 0.22 micro filter and purified on a Waters preparative HPLC system with a C18 (5  $\mu$ m, 19x250 mm) column (solvent A = H<sub>2</sub>O + 0.01% TFA, solvent B = acetonitrile + 0.01% TFA, flow rate = 15 mL/min). Collected HPLC fractions were characterized by MALDI-TOF-MS and analytical UPLC (see Section IV).

Collected peptide was freeze-dried for long-term storage. The lyophilized powder was dissolved in H<sub>2</sub>O (for crystallization and ITC) or DMSO (for ELISA) and filtered. The peptide concentration was measured via absorbance with a ThermoScientific Nanodrop 2000. The peptide molar extinction coefficient was calculated as previous reported.<sup>2</sup>

### 2) Protein Expression and Purification

A plasmid containing TEV protease gene pDZ2087 was a gift from David Waugh (Addgene plasmid # 92414). TEV protease was expressed and purified as previous reported.<sup>3</sup> Purified TEV protease was aliquoted and stored at -20°C for future use.

A GST tag plasmid (pGEX-4T-1) containing a TEV cleavage site and codon optimized TNF $\alpha$  gene fragment (with BamHI/NotI insertion) was purchased from Gene Universal and transformed into BL21 competent cells. GST-TNF $\alpha$  was expressed in LB media with 1 mM IPTG induction at 18°C overnight. The cell pellets were harvested the next morning by centrifuging at 8,000 rpm for 30 minutes at 4°C. The collected cell pellets were frozen at -20°C.

Cell pellets were lysed in lysis buffer (50 mM Tris at pH 7.5, 150 mM NaCl, 5% glycerol, 2 mM BME, 2 mM MgCl<sub>2</sub>) with lysozyme and DNase I. The lysis mixture was stirred at room

temperature for 1 hour and then incubated at 4°C overnight. The lysate was then sonicated and spun down at 8,000 rpm. The supernatant was loaded onto a GSTrap column and purified by washing buffer (50 mM Tris at pH 7.5, 150 mM NaCl, 5% glycerol, 2 mM BME). The GST tag was cleaved on column by injecting 2 mol% TEV onto the column and incubating the column at room temperature overnight. The tag-free TNF $\alpha$  was eluted from GSTrap, and the TEV protease was removed by eluting the solution from a HisTrap column with buffer (50 mM Tris at pH 7.5, 150 mM NaCl). The eluted free TNF $\alpha$  was further purified by size-exclusion column chromatography (Superdex 75). The purified TNF $\alpha$  was added to pre-chilled refolding buffer to final concentration of 20  $\mu$ g/mL and stirred for three days at 4°C. The refolding buffer contains 50 mM Tris at pH 9.5, 150 mM NaCl, 500 mM L-arginine, 1 mM L-glutathione reduced, 1 mM L-glutathione oxidized. The refolded TNF $\alpha$  was concentrated and further purified on a size-exclusion column in PBS (for ITC) or in 50 mM Tris at pH 7.5, 150 mM NaCl (for crystallization).

### **3) Crystallization, X-ray Diffraction Data Collection, and Structure Solution**

Peptide and TNF $\alpha$  were premixed at 1:1 molar ratio of peptide to TNF $\alpha$  monomer, and the mixture was incubated at room temperature overnight before setting up crystal trays. The initial screens were carried out on 96-well sitting drop vapor diffusion plates with commercial crystal screen conditions. For each condition, 200 nL of TNF $\alpha$ -peptide solution was combined with 200 nL precipitant solution with a TTP LabTech Mosquito. Crystal growth was monitored under a microscope every day for at least two weeks. The initial crystal hits were then optimized with 48-well hanging drop plates.

Diffraction data were collected from LS-CAT and GM/CA beam lines at APS (Argonne National Laboratory). Indexing, integration, and scaling were carried out using XDS/XSCALE and autoPROC programs.<sup>4,5</sup>

The TNF $\alpha$  protein chains in the TNF $\alpha$ -1 structure were solved by molecular replacement in Phaser-MR using eight single chains of TNF $\alpha$  derived from native human TNF $\alpha$  crystal structure (PDB 1TNF) as the search model.<sup>6-8</sup> The number of copies used in the search was predicted by Matthew's probabilities.<sup>9,10</sup> The TNF $\alpha$  protein chains in the TNF $\alpha$ -3 structure were solved by AutoBuild using the single chain TNF $\alpha$  as the starting model. The peptides in both models were built manually in Coot using a poly-alanine helix starting model.<sup>11</sup> The non-proteinogenic residues (Aib and  $\beta$ -amino acids) were first built and refined in the program Elbow, introduced to the peptide chains in Coot, and refined in Phenix Refine with defined linkage files.<sup>12</sup>

### **4) Isothermal Titration Calorimetry (ITC)**

Separate solutions of 1 mM peptide and 75  $\mu$ M TNF $\alpha$  (monomer concentration) were dialyzed against PBS in the same beaker, and each solution was diluted to the experiment concentration with PBS or PBS with 0.05% TWEEN20. All experiments were performed on a MicroCal VP-ITC. In the peptide to protein titration experiment, 300  $\mu$ M peptide was loaded in the injection syringe, and 30  $\mu$ M TNF $\alpha$  (monomer concentration) was added in the sample cell. The titrations were performed at 37°C. The control experiments (buffer-to-buffer, peptide-to-buffer, and buffer-to-protein) were carried out at 37°C and repeated three times. The data were processed on Origin 7.

### **5) Ultra-high Performance Liquid Chromatography-Size Exclusion Chromatography (UPLC-SEC)**

Recombinant TNF $\alpha$  expressed and purified in house was non-specifically labeled with fluorescein 5-isothiocyanate (FITC; TCI Chemical, F0026) in 0.1 M sodium carbonate buffer (pH 9.0). The reaction solution was incubated in the dark overnight at 4 °C, and then excess FITC was removed by extensive dialysis. The conformation and bioactivity of the labeled protein, FITC-TNF $\alpha$ , were confirmed by size-exclusion chromatography analysis and WEHI-13VAR cell viability assay.

Solutions containing 3  $\mu$ M FITC-TNF $\alpha$  or 50  $\mu$ M peptide were mixed and pre-incubated in PBS at 37 °C in the UPLC sample manager. For each time point, 5  $\mu$ L of the pre-incubated solution was injected on a Protein BEH SEC column (1.7  $\mu$ m, 4.6 mm x 150 mm) with PBS as the mobile phase (flow rate = 0.4 mL/min). The results were monitored by fluorescence-UPLC (excitation at 494 nm; emission at 519 nm).

## 6) TNF $\alpha$ /TNFR1 ELISA

Recombinant human sTNFR1 was diluted in PBS, added to the ELISA plate, and incubated at 4°C overnight to immobilize TNFR1. After overnight immobilization, the plate was washed with PBS + TWEEN (PBST). Then 1% BSA in PBS was added and incubated for 3 hours, and the plate was washed again with PBST. Serial dilutions of peptides were prepared in DMSO and added to 80 ng/mL TNF $\alpha$  (from R&D systems) in PBST. The peptide-TNF $\alpha$  solution was incubated on an orbital shaker for 1 hour and added to the washed ELISA plate. The plate was then incubated for 1 hour, followed by biotinylated anti-TNF $\alpha$  antibody coating, washing, streptavidin-alkaline phosphatase coating, washing and the *p*-nitrophenyl phosphate (pNPP) addition. Then the 405 nm absorbance in each well was recorded every two minutes during the pNPP reaction on BioTek Synergy 2 microplate reader. Each condition was run in duplicate, and each experiment was repeated at least three times. The IC<sub>50</sub> values were calculated using GraphPad Prism 8.

## 7) WEHI-13VAR Cell Viability Assay

*a) Cell culture:* WEHI-13VAR mouse fibrosarcoma cells were cultured in RPMI + 10% FBS at 37°C with 5% CO<sub>2</sub>. When cells reached ~75-80% confluency, cells were trypsinized, counted and reseeded at 120,000 cells/mL density in 100  $\mu$ L fresh RPMI + 10% FBS medium per well in 96-well white, clear-bottom plates. Plated cells were kept in the incubator for 18-24 hours to adhere before TNF $\alpha$  or TNF $\alpha$ /peptide addition.

*b) Pre-incubation:* Serial dilutions of peptides were prepared in DMSO. 5  $\mu$ L of peptide solutions in DMSO were added to 120  $\mu$ L of 83 ng/mL of TNF $\alpha$  in PBS. The “+ TNF $\alpha$ ” control was prepared by mixing 120  $\mu$ L of 83 ng/mL of TNF $\alpha$  with 5  $\mu$ L of DMSO; the “- TNF $\alpha$ ” control was prepared by mixing 120  $\mu$ L of PBS with 5  $\mu$ L of DMSO. The pre-incubation mixtures were incubated for 1, 2, 4, 6, 12, and 24 hours at 37°C before being diluted and added to cells.

*c) Addition to cells:* After the pre-incubation step was completed, the TNF $\alpha$ /peptide mixture was diluted 350-fold with RPMI (no FBS) + 3.8  $\mu$ g/mL actinomycin D solution. 50  $\mu$ L of diluted pre-incubation mixture was added to each well. The final concentration of TNF $\alpha$  was approximately 0.08 ng/mL. The plates were incubated at 37°C with 5% CO<sub>2</sub> for ~18 hours to allow TNF $\alpha$  to induce cell death. For data analysis, the initial inhibitor concentrations before this dilution step were used.

*d) CellTiter-Glo Assay:* After 18 hours of incubation, the plates were removed from the incubator and allowed to cool to room temperature. 150  $\mu$ L of CellTiter-Glo reagent (Promega, WI) was then added to each well, and the plate was agitated for 2 minutes on an orbital shaker. The luminescence value was measured on a BioTek Synergy 2 microplate reader. Data were normalized to “- TNF $\alpha$ ” control as 100% (represents maximal cell survival) and to “+ TNF $\alpha$ ” control as 0% (represents minimal cell survival). IC<sub>50</sub> values were calculated using GraphPad Prism 8.0. Data points are presented as mean  $\pm$  SD of three independent experiments.

### III. Supporting Figures and Tables

**a**

|                           |                                                                   | TNF $\alpha$ -TNFR1<br>ELISA<br>IC <sub>50</sub> (nM) |
|---------------------------|-------------------------------------------------------------------|-------------------------------------------------------|
| Z-TNF $\alpha$            | VDNKFNKELGWAIGEIGTLPNLNHQQFRAFILSLWDDP- [HELIX3] -NH <sub>2</sub> | 4.9*                                                  |
| $\alpha/\beta$ -Peptide 1 | <br>VDNKFNKXCGWRIGEUGTDPNLNHUQFRUKILZCWX-NH <sub>2</sub>          | 11                                                    |
| $\alpha$ -Peptide 2       | VDNKFNKECGWRIGEAGTDPNLNHQQFRAKILSIWDDC-NH <sub>2</sub>            | 18                                                    |
| $\alpha$ -Peptide 3       | ECGWRIGEAGTDPNLNHQQFRAKILSIWEEC-NH <sub>2</sub>                   | 18                                                    |
| $\alpha/\beta$ -Peptide 4 | <br>VDNKFNKXCGWRIGEUGTDPNLNHQQFRUKILZIWXC-NH <sub>2</sub>         | 4.7                                                   |
| $\alpha/\beta$ -Peptide 5 | <br>VDNKFNKXCGZRIGEUGTDPNLNHQQFRUKILZIWXC-NH <sub>2</sub>         | 28*                                                   |
| $\alpha/\beta$ -Peptide 6 | <br>CGWRIGEUGTDPNLNHQQFRUKILZIWXC-NH <sub>2</sub>                 | 11*                                                   |
| $\alpha/\beta$ -Peptide 7 | <br>VDNKFNKXLGWRIGEUGTDPNLNHQQFRUKILZIWXC-NH <sub>2</sub>         | 24*                                                   |
| $\alpha/\beta$ -Peptide 8 | <br>NKXLGWRIGEUGTDPNLNHQQFRUKILZIWXC-NH <sub>2</sub>              | 29*                                                   |
| $\alpha$ -Peptide 9       | <br>ECGWRIGEAGTDPNLNHQQFRAKILSCWD-NH <sub>2</sub>                 | 34,000                                                |

**b**

(L)- $\alpha$ -residue

Aib (U)

(L)- $\beta^3$ -residue

ACPC (X)

APC (Z)

**Figure S1:** List of  $\alpha$  and  $\alpha/\beta$ -peptides (1-9) derived from Z-TNF $\alpha$  and corresponding IC<sub>50</sub> values determined by TNF $\alpha$ /TNFR1 ELISA competition assays.  $\alpha/\beta$ -peptides 4-8 were used for TNF $\alpha$  co-crystallization but failed to give high resolution data sets. The  $\alpha$ -peptide 9 was synthesized and tested in parallel with  $\alpha$ -peptide 3 as part of our effort to shorten  $\alpha$ -peptide 2 and obtain high-resolution X-ray crystallography data. \*IC<sub>50</sub> values that were reported previously.<sup>13</sup> [Helix3] = SQSANLLAEAKKLNDQAQPK. (b) Structures of a generic (L)- $\alpha$ -residue, an Aib residue (U) (green), a (L)- $\beta^3$ -residue (blue) a cyclic  $\beta$ -residue ACPC residue (X) (red), and a cyclic  $\beta$ -residue APC residue (Z) (red).



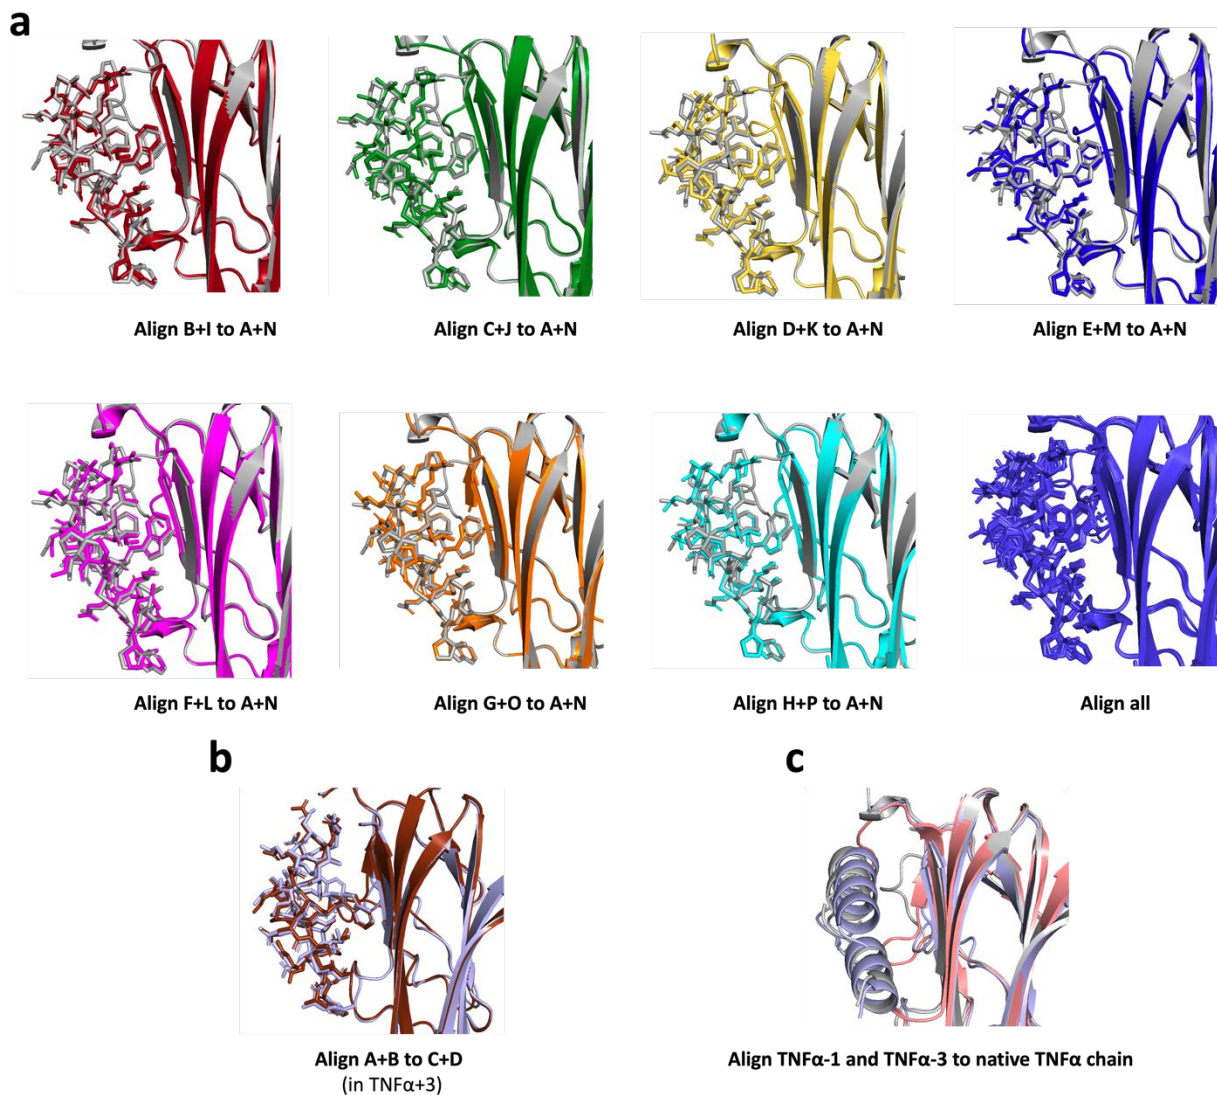

**Figure S2:** (a) Alignments of eight TNF $\alpha$ +1 protomers found in the asymmetric unit in 7TA6. (b) Alignment of two TNF $\alpha$ +3 protomers found in the asymmetric unit in 7TA3. (c) Alignment of TNF $\alpha$ +1 (light grey) and TNF $\alpha$ +3 (light purple) to native TNF $\alpha$  monomer (salmon). All atoms in TNF $\alpha$ -1 protomer (TNF $\alpha$ +peptide 1) and TNF $\alpha$ -3 protomer (TNF $\alpha$ +peptide 3) were aligned to native TNF $\alpha$  monomer (PDB ID: 1TNF). The displacements (RMSD) of each alignment are summarized in Table S1 and S2, calculated using command align on Pymol.

**Table S1. Comparison of TNF $\alpha$ +peptide protomers in the asymmetric unit**

| Chain NO.                                         | RMSD <sup><math>\alpha</math></sup> (Å) |              |
|---------------------------------------------------|-----------------------------------------|--------------|
|                                                   | All atoms                               | C-alpha      |
| <b>Aligned to A+N in TNF<math>\alpha</math>+1</b> |                                         |              |
| A+N in TNF $\alpha$ +1                            | --                                      | --           |
| B+I in TNF $\alpha$ +1                            | 0.394                                   | 0.302        |
| C+J in TNF $\alpha$ +1                            | 0.341                                   | 0.247        |
| D+K in TNF $\alpha$ +1                            | 0.358                                   | 0.290        |
| E+M in TNF $\alpha$ +1                            | 0.395                                   | 0.305        |
| F+L in TNF $\alpha$ +1                            | 0.356                                   | 0.288        |
| G+O in TNF $\alpha$ +1                            | 0.278                                   | 0.206        |
| H+P in TNF $\alpha$ +1                            | 0.369                                   | 0.268        |
| <b>Aligned to A+B in TNF<math>\alpha</math>+3</b> |                                         |              |
| A+B in TNF $\alpha$ +3                            | --                                      | --           |
| C+D in TNF $\alpha$ +3                            | 0.415                                   | 0.334        |
| <b>A+N in TNF<math>\alpha</math>+1</b>            | <b>0.579</b>                            | <b>0.320</b> |

<sup>$\alpha$</sup>  Root mean square deviation (RMSD) between corresponding atoms after pairwise superposition of TNF $\alpha$ +peptide chains found in the asymmetric units from complexes TNF $\alpha$ +1 and TNF $\alpha$ +3.

**Table S2. Comparison of TNF $\alpha$  chains in the asymmetric unit**

| Aligned to native TNF $\alpha$ single chain | RMSD $^{\alpha}$ (Å)                 |                                      |
|---------------------------------------------|--------------------------------------|--------------------------------------|
|                                             | Chain NO.                            | All atoms                            |
| A in TNF $\alpha$ +1                        | 0.710                                | 0.534                                |
| B in TNF $\alpha$ +1                        | 0.680                                | 0.523                                |
| C in TNF $\alpha$ +1                        | 0.714                                | 0.514                                |
| D in TNF $\alpha$ +1                        | 0.718                                | 0.553                                |
| E in TNF $\alpha$ +1                        | 0.698                                | 0.605                                |
| F in TNF $\alpha$ +1                        | 0.709                                | 0.538                                |
| G in TNF $\alpha$ +1                        | 0.697                                | 0.528                                |
| H in TNF $\alpha$ +1                        | 0.656                                | 0.527                                |
| <b>Average in TNF<math>\alpha</math>+1</b>  | <b>0.698 (<math>\pm</math>0.019)</b> | <b>0.540 (<math>\pm</math>0.027)</b> |
| B in TNF $\alpha$ +3                        | 0.705                                | 0.582                                |
| D in TNF $\alpha$ +3                        | 0.734                                | 0.539                                |
| <b>Average in TNF<math>\alpha</math>+3</b>  | <b>0.720 (<math>\pm</math>0.015)</b> | <b>0.561 (<math>\pm</math>0.022)</b> |

$^{\alpha}$  Root mean square deviation (RMSD) between corresponding atoms after pairwise superposition of TNF $\alpha$  chains found in the asymmetric units from complexes TNF $\alpha$ +1 and TNF $\alpha$ +3 to native TNF $\alpha$  monomer in 1TNF.

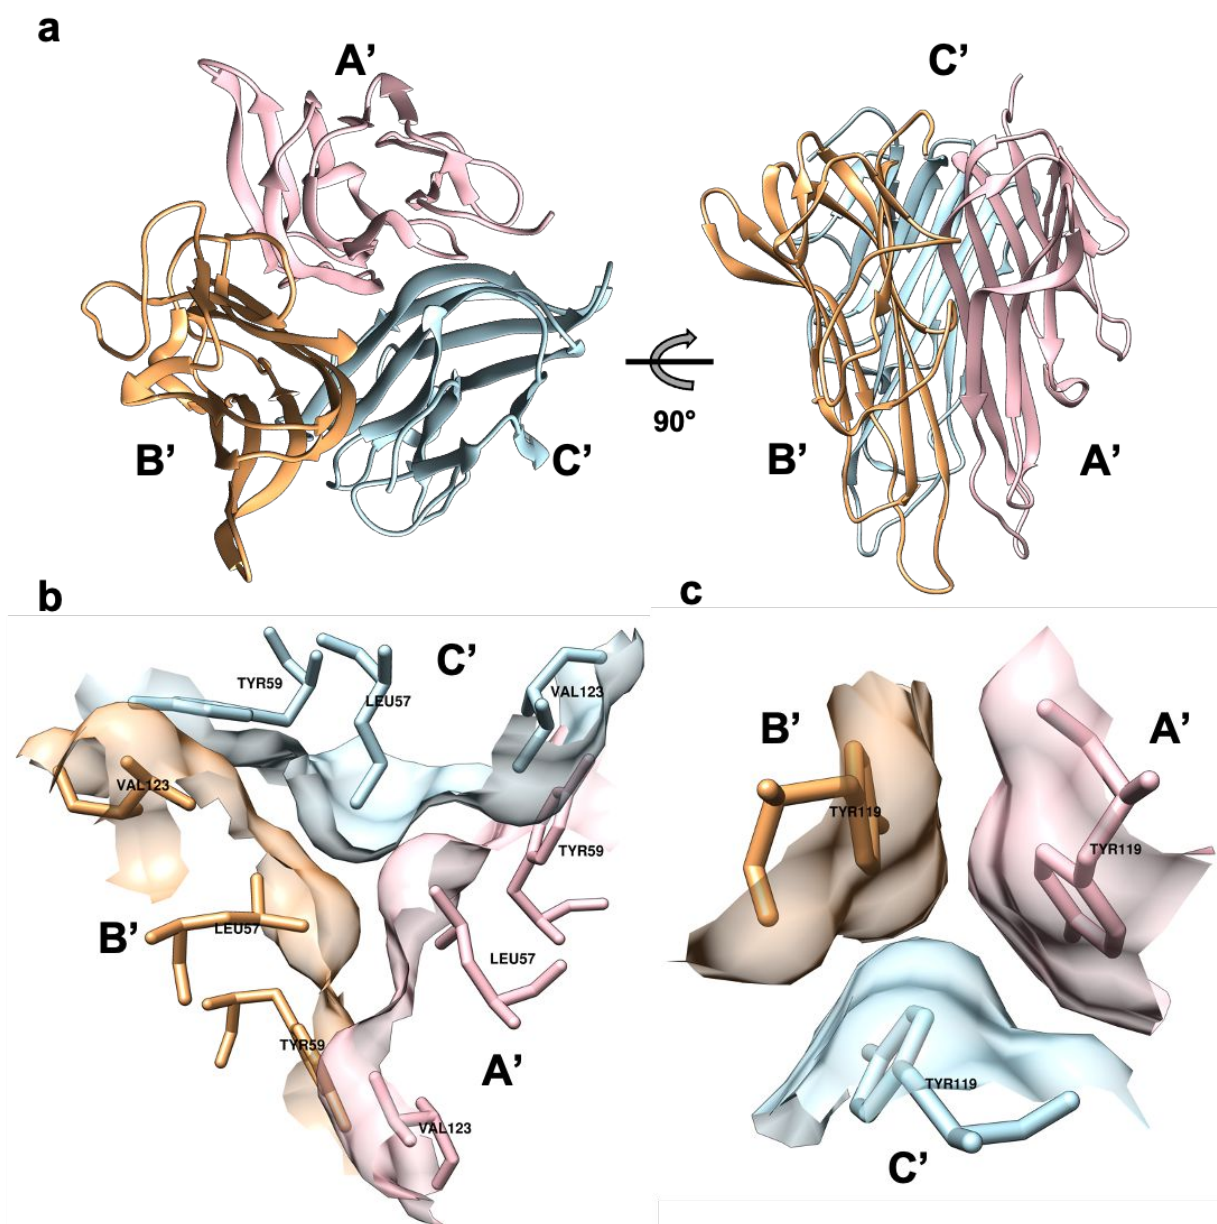

**Figure S3:** The structure of native TNF $\alpha$  (PDB code: 1TNF).<sup>8</sup> (a) Three subunits were arbitrarily assigned as A' (pink), B' (orange) and C' (blue). (b) and (c) Top and bottom zoom-in views highlighting some of the hydrophobic interactions that facilitate TNF $\alpha$  trimeric conformation. Parts of the main chains were hidden for visual clarity.

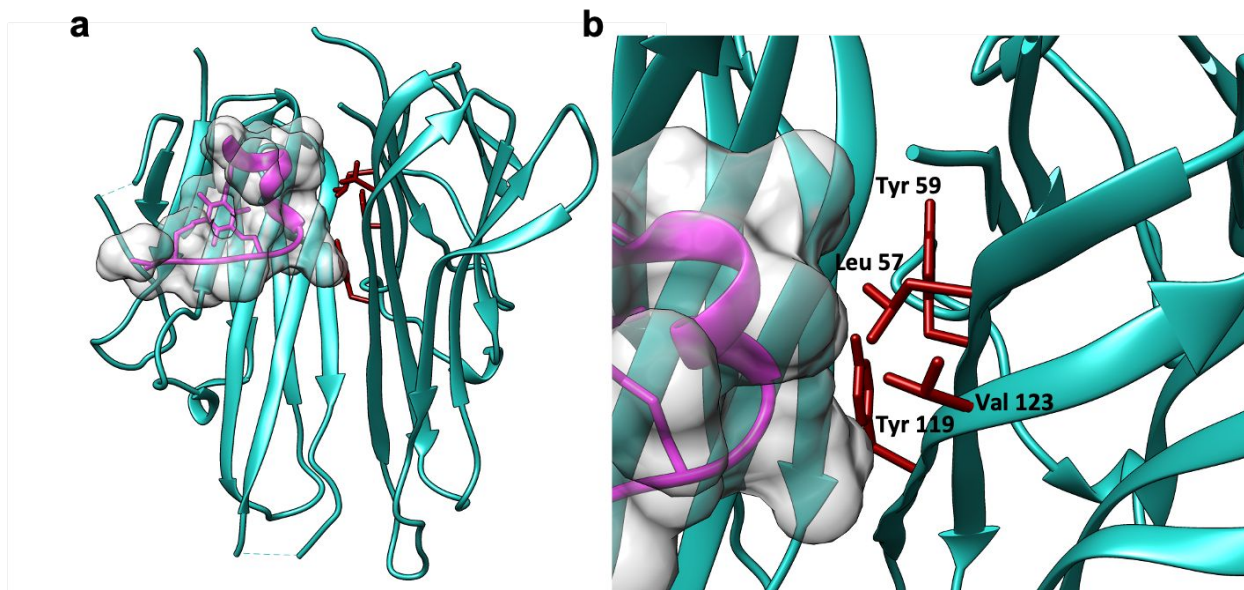

**Figure S4:** (a) Co-crystal structure of cyclic peptide M21 (in magenta ribbon and light grey volume) bound to dimeric TNF $\alpha$  (in cyan) (PDB ID: 4TWT).<sup>14</sup> (b) Zoom-in view of the surface of peptide M21 bound to dimeric TNF $\alpha$ . The peptide volume (in grey) does not clash with the key TNF $\alpha$  interface residues (Leu<sup>57</sup>, Tyr<sup>59</sup>, Tyr<sup>119</sup>, and Val<sup>123</sup>), in contrast to the clashes we would expect for  $\alpha/\beta$ -peptide **1** (Figure 3) or  $\alpha$ -peptide **3** (Figure 4).

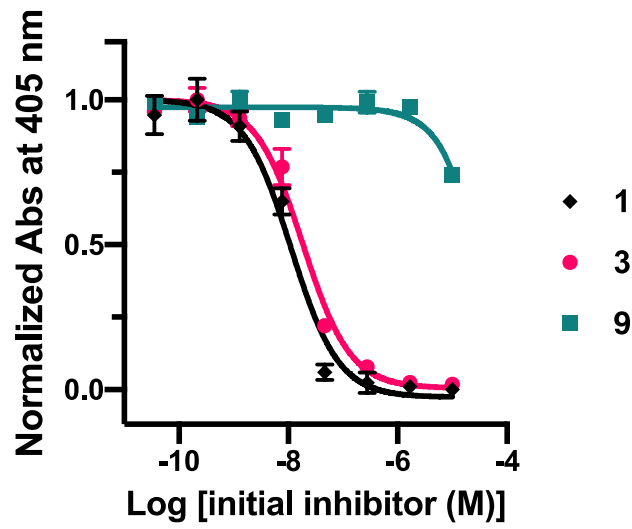

**Figure S5:** Dose response curves of  $\alpha/\beta$ -peptide **1**,  $\alpha$ -peptide **3** and  $\alpha$ -peptide **9** in the TNF $\alpha$ /TNFR1 competition ELISA assay. The calculated IC<sub>50</sub> values of **1**, **3** and **9** are 11, 18 and 34,000 nM, respectively. Data points represent standard deviation (SD) from the mean. Each experiment was repeated at least three times.



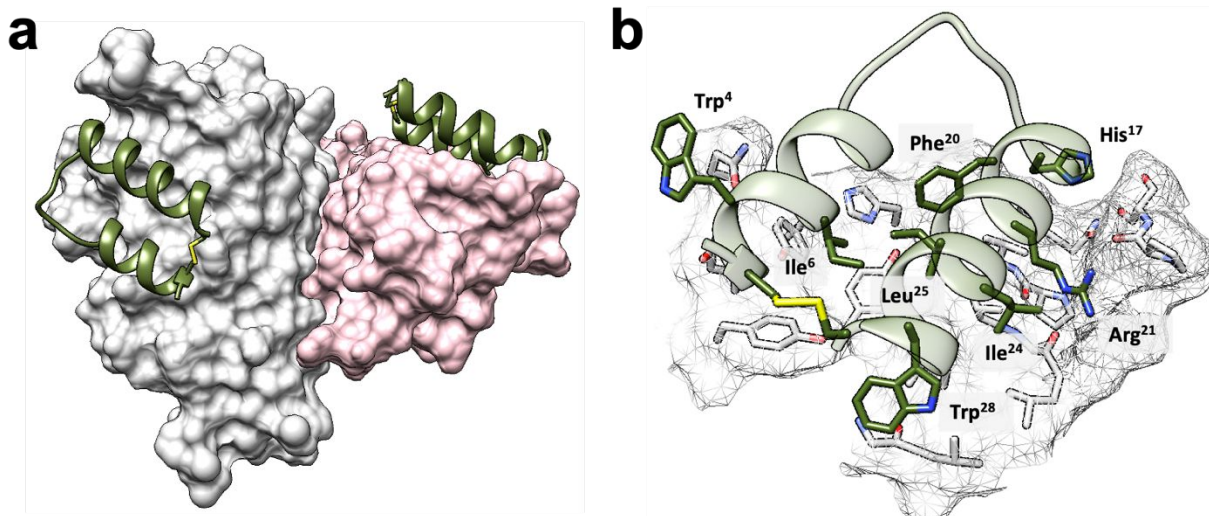

**Figure S6.** Crystal structure of  $\alpha$ -peptide **3** bound to TNF $\alpha$  with a 1:1 stoichiometry (PDB ID: 7TA3). **(a)** Front views of the asymmetric unit, which contains two copies  $\alpha$ -peptide **3** (in green, intramolecular disulfide in yellow) and two copies of TNF $\alpha$  monomer (light grey and pink). Two TNF $\alpha$  subunits pack against each other perpendicularly, in contrast to the parallel packing in the native TNF $\alpha$  trimer. **(b)** Side chains of the  $\alpha$ -peptide **3** that contact the TNF $\alpha$  surface are shown, including those from Leu<sup>2</sup>, Trp<sup>4</sup>, Ile<sup>6</sup>, His<sup>17</sup>, Phe<sup>20</sup>, Arg<sup>21</sup>, Ile<sup>24</sup>, Leu<sup>25</sup>, and Trp<sup>28</sup>, which are conserved with **1**.

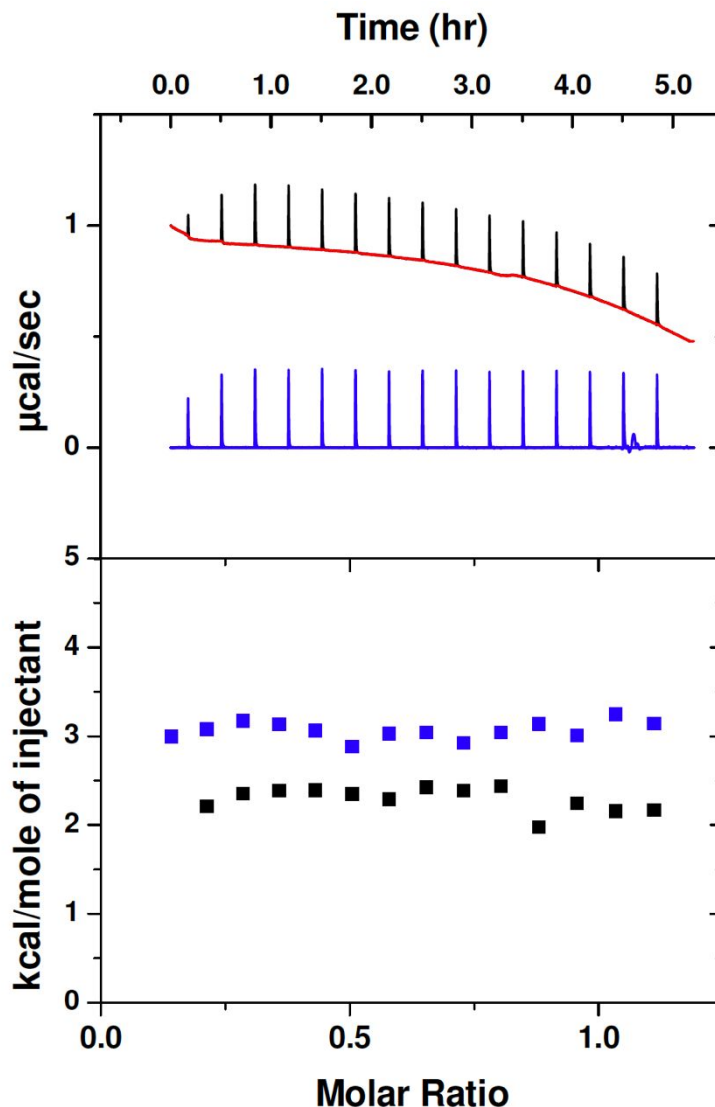

**Figure S7:** Controls for the isothermal titration calorimetry (ITC) assay for peptide **3** titrated into buffer (**blue**) and into TNF $\alpha$  (**black**). **Blue:** In the peptide-to-buffer control, a large endothermic dilution heat (represented by positive titration peaks) was observed, presumably due to the solvation of the highly charged peptide. Similar effects were observed with the other peptides. **Black:** When the titrations were initially performed in PBS without TWEEN-20, only the peptide dilution heat was detected, presumably due to the slow binding (with trimer dissociation) of TNF $\alpha$  with the peptide in the absence of TWEEN-20 as reported previously.<sup>13</sup> When 0.05% TWEEN-20 was included in the buffer (Figure 4c), noticeable exothermic events (represented by negative titration peaks) were detected by the calorimeter, suggesting that peptide binding occurs and is fast enough to be detected, although the endothermic peptide dilution heat was seen as well (in **blue**). The dependency on TWEEN-20 in these ITC assays is consistent with our hypothesis that peptide-TNF $\alpha$  binding is accelerated by detergents like TWEEN-20.<sup>13</sup>



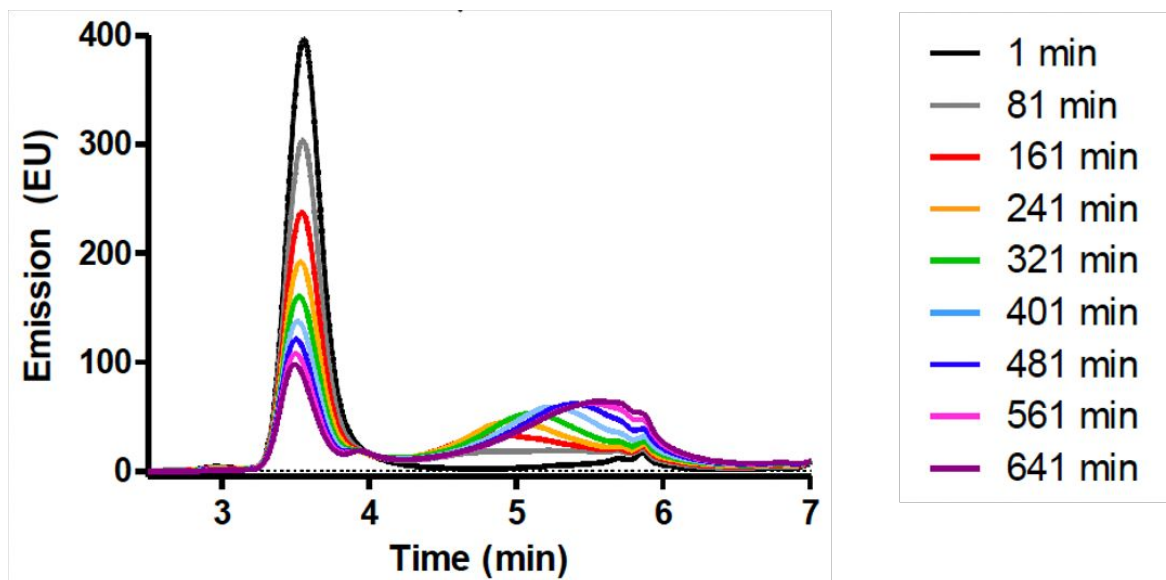

**Figure S8:** UPLC-SEC analysis of TNF $\alpha$  dissociation induced by peptide **2** in PBS at 37 °C. TNF $\alpha$  was labeled with FITC to enable fluorescence UPLC-SEC. Elution was monitored at 495 nm (emission at 519 nm). The FITC-TNF $\alpha$  trimer eluted at 3.5 minutes. Upon peptide **2** addition, the size of the trimeric peak (eluted at 3.5 min) slowly decreases over time, and the other peak (eluted between 4.5 to 6 min) grows over time. The later peak (eluted between 4.5 to 6 min) corresponds to dissociated TNF $\alpha$ , although we cannot determine from these measurements whether the dissociated form is a monomer, a dimer or a combination of monomer and dimer. This observation suggests that our peptides induce dissociation of the TNF $\alpha$  trimer to a smaller species in solution. ([FITC-TNF $\alpha$ ] = 3  $\mu$ M; [peptide **2**] = 50  $\mu$ M. The TNF $\alpha$  and peptide preincubation and size-exclusion chromatography were both carried out in PBS at 37 °C. Stationary phase: Protein BEH SEC, 1.7  $\mu$ m, 4.6 mm x 150 mm.)

**Table S3. IC<sub>50</sub> Values of Peptide Antagonists and Hydrophobically Modified Derivatives Measured by TNF $\alpha$  – TNFR1 Competition ELISA**  
(pre-inc. for 1 hr, at RT, with 0.05% TWEEN20)

| Peptide                                                       | IC <sub>50</sub> (nM) |
|---------------------------------------------------------------|-----------------------|
| <b>1</b>                                                      | 11                    |
| (C <sub>12</sub> ) <sub>2</sub> -PEG <sub>16</sub> - <b>1</b> | 450                   |
| <b>2</b>                                                      | 18                    |
| (C <sub>12</sub> ) <sub>2</sub> -PEG <sub>16</sub> - <b>2</b> | 270                   |
| <b>4</b>                                                      | 4.7                   |
| (C <sub>12</sub> ) <sub>2</sub> -PEG <sub>16</sub> - <b>4</b> | 33                    |

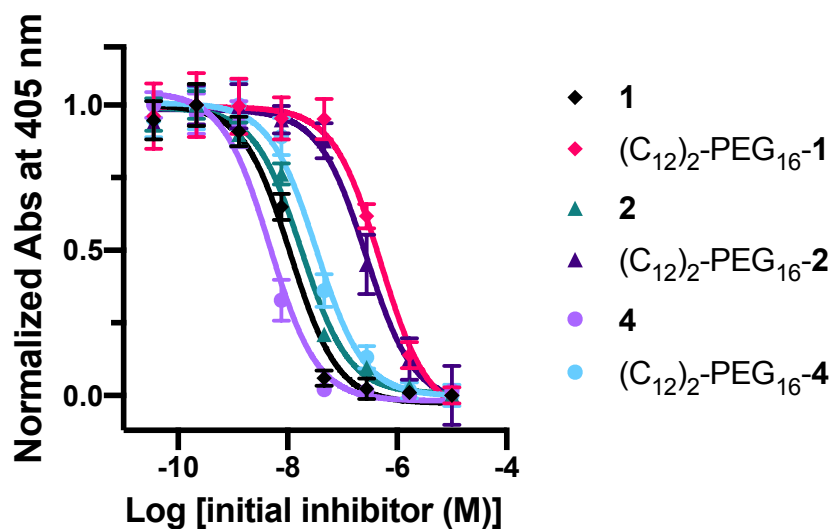

**Figure S9.** Evaluation of peptides **1**, **2**, **4** and their hydrophobically modified analogues in their abilities to block TNF $\alpha$ -TNFR1 interaction by TNF $\alpha$ -TNFR1 competition ELISA. IC<sub>50</sub> values are summarized in Table S3. Peptides were pre-incubated with 80 ng/mL TNF $\alpha$  in PBS containing 0.05% TWEEN20 at room temperature for 1 hour. Data points presented as mean  $\pm$  SD with three independent experiments (N = 3).

**Table S4. IC<sub>50</sub> values and Maximal Efficacy of Peptide 4 and (C<sub>12</sub>)<sub>2</sub>-PEG<sub>16</sub>-4 in WEHI-13VAR Viability Assays as a Function of Pre-Incubation Time**  
*(Pre-inc for 1-24 hr, at 37 °C, without TWEEN 20)*

| <b>Pre-Inc Time (hr)</b> | <b>Peptide</b>                                         | <b>IC<sub>50</sub> (nM)<sup>α</sup></b> | <b>Max. Efficacy (%)<sup>β</sup></b> |
|--------------------------|--------------------------------------------------------|-----------------------------------------|--------------------------------------|
| <b>1</b>                 | <b>4</b>                                               | ND <sup>γ</sup>                         | 0                                    |
|                          | <b>(C<sub>12</sub>)<sub>2</sub>-PEG<sub>16</sub>-4</b> | 360                                     | 19                                   |
| <b>2</b>                 | <b>4</b>                                               | ND                                      | 0                                    |
|                          | <b>(C<sub>12</sub>)<sub>2</sub>-PEG<sub>16</sub>-4</b> | 970                                     | 36                                   |
| <b>4</b>                 | <b>4</b>                                               | 1.9                                     | 15                                   |
|                          | <b>(C<sub>12</sub>)<sub>2</sub>-PEG<sub>16</sub>-4</b> | 190                                     | 64                                   |
| <b>6</b>                 | <b>4</b>                                               | 7.7                                     | 25                                   |
|                          | <b>(C<sub>12</sub>)<sub>2</sub>-PEG<sub>16</sub>-4</b> | 210                                     | 73                                   |
| <b>12</b>                | <b>4</b>                                               | 4.7                                     | 64                                   |
|                          | <b>(C<sub>12</sub>)<sub>2</sub>-PEG<sub>16</sub>-4</b> | 61                                      | 95                                   |
| <b>24</b>                | <b>4</b>                                               | 4.0                                     | 85                                   |
|                          | <b>(C<sub>12</sub>)<sub>2</sub>-PEG<sub>16</sub>-4</b> | 21                                      | 91                                   |

α. Concentrations necessary for 50% protection from TNFα-induced death (IC<sub>50</sub>) measured with WEHI-13VAR cells after the indicated time period of TNFα-peptide pre-incubation.

β. Maximal efficacy (%) is the relative percentage of cells rescued from TNFα-induced cell death after the indicated time period of TNFα-peptide pre-incubation.

γ. Not determined (ND)

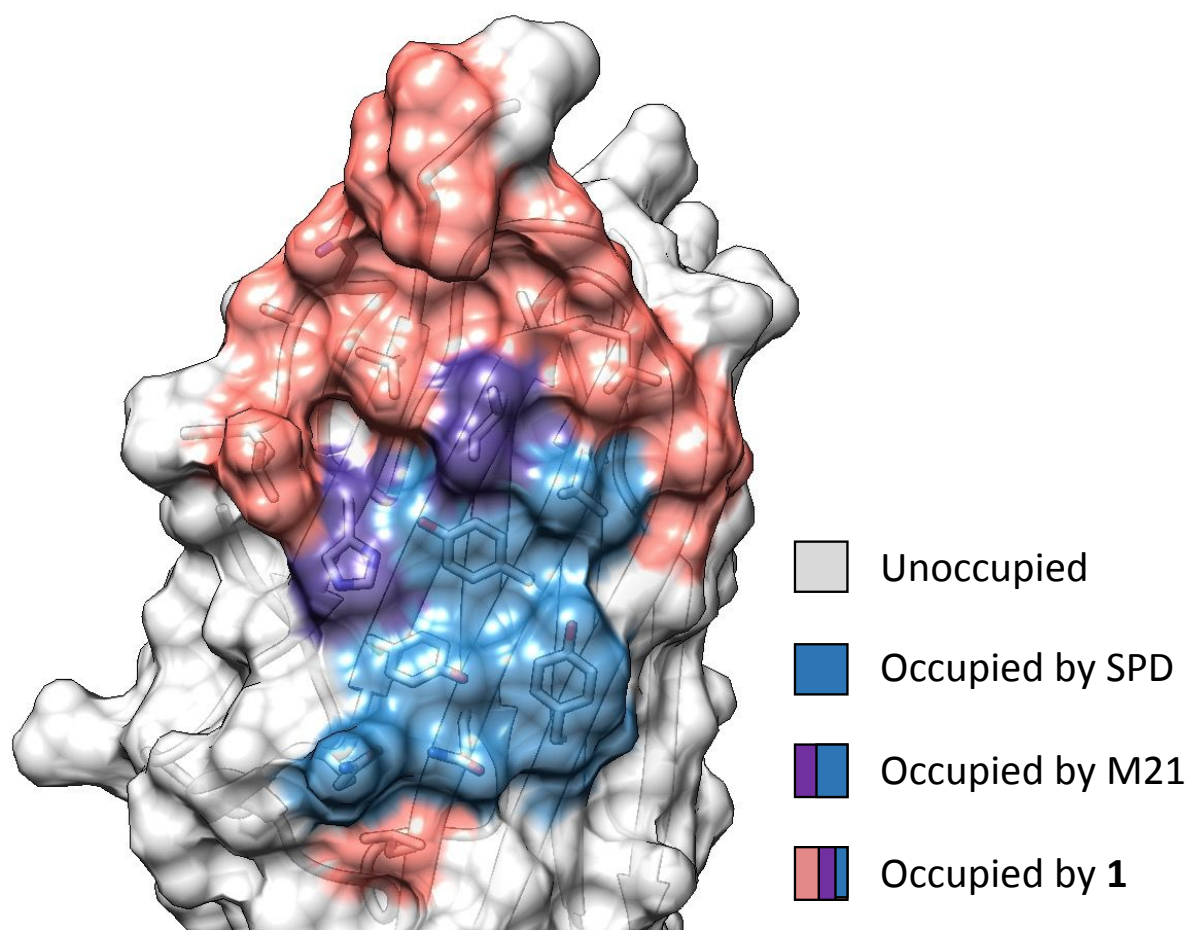

**Figure S10:** Comparison of surface areas on a TNF $\alpha$  monomer that are covered by SPD, M21 or  $\alpha/\beta$ -peptide **1**.

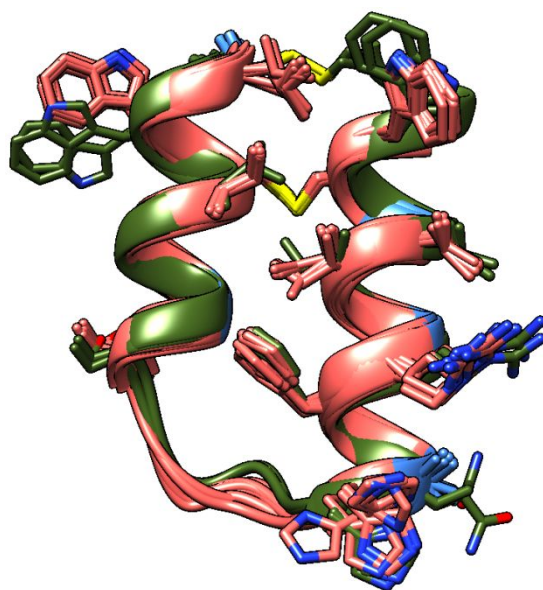

**Figure S11:** The alignments of all peptides found in the asymmetric units from structures TNF $\alpha$ +1 (**1** in pink) and TNF $\alpha$ +3 (**3** in green). Note that the locations of the disulfide crosslink differ between **1** and **3**.

**Table S5. Comparison of peptide chains in the asymmetric unit**

| Chain NO.                           | RMSD <sup>α</sup> (Å) |         |
|-------------------------------------|-----------------------|---------|
|                                     | All atoms             | C-alpha |
| <b>Aligned to chain I in TNFα+1</b> |                       |         |
| I in TNFα+1                         | --                    | --      |
| J in TNFα+1                         | 0.321                 | 0.293   |
| K in TNFα+1                         | 0.442                 | 0.373   |
| L in TNFα+1                         | 0.412                 | 0.330   |
| M in TNFα+1                         | 0.359                 | 0.273   |
| N in TNFα+1                         | 0.366                 | 0.325   |
| O in TNFα+1                         | 0.459                 | 0.382   |
| P in TNFα+1                         | 0.414                 | 0.374   |
| <b>Aligned to chain A in TNFα+3</b> |                       |         |
| A in TNFα+3                         | --                    | --      |
| C in TNFα+3                         | 0.328                 | 0.231   |
| I in TNFα+1                         | 0.823                 | 0.710   |

<sup>α</sup> Root mean square deviation (RMSD) between corresponding atoms after pairwise superposition of peptide chains found in the asymmetric units from complexes TNFα+1 and TNFα+3.

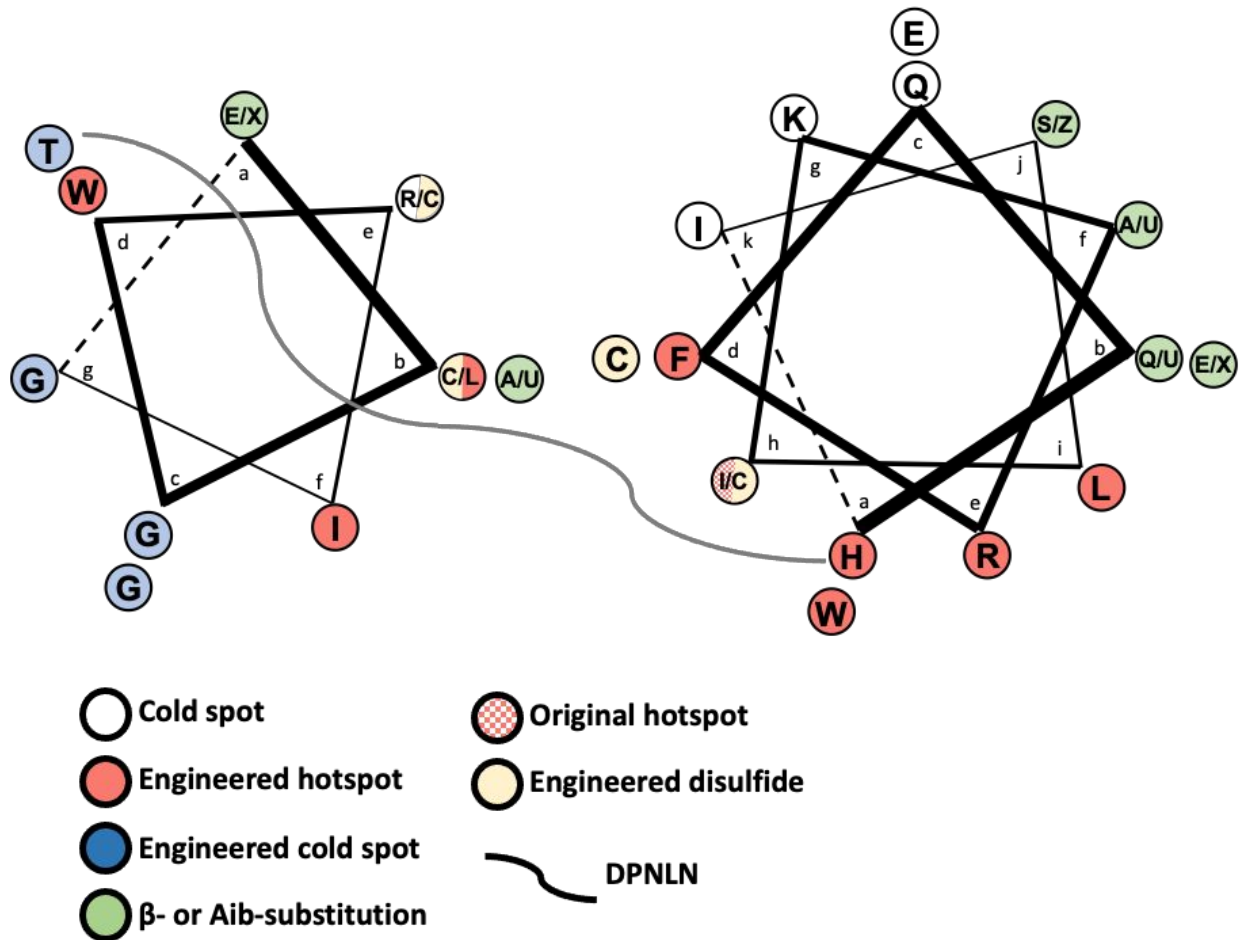

|                | [Helix 1]                                                                                     | [Loop]  | [Helix 2]          | [Helix 3]          |
|----------------|-----------------------------------------------------------------------------------------------|---------|--------------------|--------------------|
| Z-IgG          | VDNKFNKEQQNAFYEI                                                                              | LHLPNLN | EEQRNAFIQSLKDDPSQ  | SANLLAEAKKLNDQAQPK |
| Z-TNF $\alpha$ | VDNKFNKELGWAIGEIG                                                                             | TLPNLN  | NHQQFRAFILSLWDDPSQ | SANLLAEAKKLNDQAQPK |
| 1              | <u>X</u> LGWCIG <u>E</u> GU <u>G</u> TDPNLN <u>H</u> U <u>Q</u> FRUKIL <u>Z</u> CW <u>X</u>   |         |                    |                    |
| 3              | <u>E</u> CGWRIG <u>E</u> AGTDPNLN <u>H</u> Q <u>Q</u> FR <u>A</u> KIL <u>S</u> IW <u>E</u> EC |         |                    |                    |

**Figure S12:** (TOP) “Helix-loop-helix” diagrams of peptides 1 and 3. The TNF $\alpha$ -contacting residues are designated “hotspots,” and the residues that do not form contacts with TNF $\alpha$  are designated “cold spots.” (BOTTOM) Peptide sequences of original Z domain, Z-IgG, that was used as a starting point in the phage display study; the phage display-derived TNF $\alpha$ -targeting Z domain, Z-TNF $\alpha$ ; and peptides 1 and 3.<sup>15</sup> The positions highlighted in red were varied in the phage display process.

**Table S6. TNF $\alpha$ +1 Data Collection and Refinement Statistics**

| <b>PDB accession code</b>      | <b>7TA6</b>                         |
|--------------------------------|-------------------------------------|
| Beam line                      | GM/CA @APS                          |
| Wavelength                     | 1.033                               |
| Resolution range               | 39.74 - 2.672 (2.767 - 2.672)       |
| Space group                    | C 1 2 1                             |
| Unit cell                      | 143.774 143.552 76.888 90 97.847 90 |
| Total reflections              | 298794 (30736)                      |
| Unique reflections             | 43722 (4361)                        |
| Multiplicity                   | 6.8 (7.0)                           |
| Completeness (%)               | 99.86 (99.98)                       |
| Mean I/sigma(I)                | 10.58 (0.99)                        |
| Wilson B-factor                | 75.67                               |
| R-merge                        | 0.1127 (1.816)                      |
| R-meas                         | 0.1222 (1.959)                      |
| R-pim                          | 0.04671 (0.7318)                    |
| CC1/2                          | 0.998 (0.383)                       |
| CC*                            | 0.999 (0.744)                       |
| Reflections used in refinement | 43691 (4360)                        |
| Reflections used for R-free    | 1997 (200)                          |
| R-work                         | 0.2481 (0.4121)                     |
| R-free                         | 0.2701 (0.4226)                     |
| CC(work)                       | 0.935 (0.558)                       |
| CC(free)                       | 0.957 (0.599)                       |
| Number of non-hydrogen atoms   | 10387                               |
| macromolecules                 | 10109                               |
| ligands                        | 481                                 |
| solvent                        | 45                                  |
| Protein residues               | 1304                                |
| RMS(bonds)                     | 0.002                               |
| RMS(angles)                    | 0.55                                |
| Ramachandran favored (%)       | 93.78                               |
| Ramachandran allowed (%)       | 5.87                                |
| Ramachandran outliers (%)      | 0.35                                |
| Rotamer outliers (%)           | 0.66                                |
| Clashscore                     | 3.76                                |
| Average B-factor               | 92.41                               |
| macromolecules                 | 92.83                               |
| ligands                        | 77.79                               |
| solvent                        | 73.89                               |
| Number of TLS groups           | 16                                  |



**Table S7. TNF $\alpha$ +3 Data Collection and Refinement Statistics**

| <b>PDB accession code</b>      | <b>7TA3</b>                 |
|--------------------------------|-----------------------------|
| Beam line                      | LS-CAT @APS                 |
| Wavelength                     | 1.127                       |
| Resolution range               | 43.28 - 2.5 (2.589 - 2.5)   |
| Space group                    | P 43 21 2                   |
| Unit cell                      | 86.56 86.56 143.73 90 90 90 |
| Total reflections              | 518153 (51336)              |
| Unique reflections             | 19581 (1910)                |
| Multiplicity                   | 26.5 (26.9)                 |
| Completeness (%)               | 99.65 (99.16)               |
| Mean I/sigma(I)                | 21.82 (1.47)                |
| Wilson B-factor                | 69.46                       |
| R-merge                        | 0.112 (1.816)               |
| R-meas                         | 0.1142 (1.851)              |
| R-pim                          | 0.02214 (0.3545)            |
| CC1/2                          | 0.999 (0.872)               |
| CC*                            | 1 (0.965)                   |
| Reflections used in refinement | 19527 (1894)                |
| Reflections used for R-free    | 1934 (191)                  |
| R-work                         | 0.2460 (0.3920)             |
| R-free                         | 0.2764 (0.4330)             |
| CC(work)                       | 0.943 (0.819)               |
| CC(free)                       | 0.930 (0.722)               |
| Number of non-hydrogen atoms   | 2782                        |
| macromolecules                 | 2767                        |
| ligands                        | 6                           |
| solvent                        | 13                          |
| Protein residues               | 353                         |
| RMS(bonds)                     | 0.004                       |
| RMS(angles)                    | 0.58                        |
| Ramachandran favored (%)       | 96.50                       |
| Ramachandran allowed (%)       | 3.50                        |
| Ramachandran outliers (%)      | 0.00                        |
| Rotamer outliers (%)           | 0.34                        |
| Clashscore                     | 6.94                        |
| Average B-factor               | 90.48                       |
| macromolecules                 | 90.56                       |
| ligands                        | 119.92                      |
| solvent                        | 70.55                       |
| Number of TLS groups           | 15                          |

## IV. MALDI-TOF-MS Spectra and UPLC Data for Synthetic Peptides

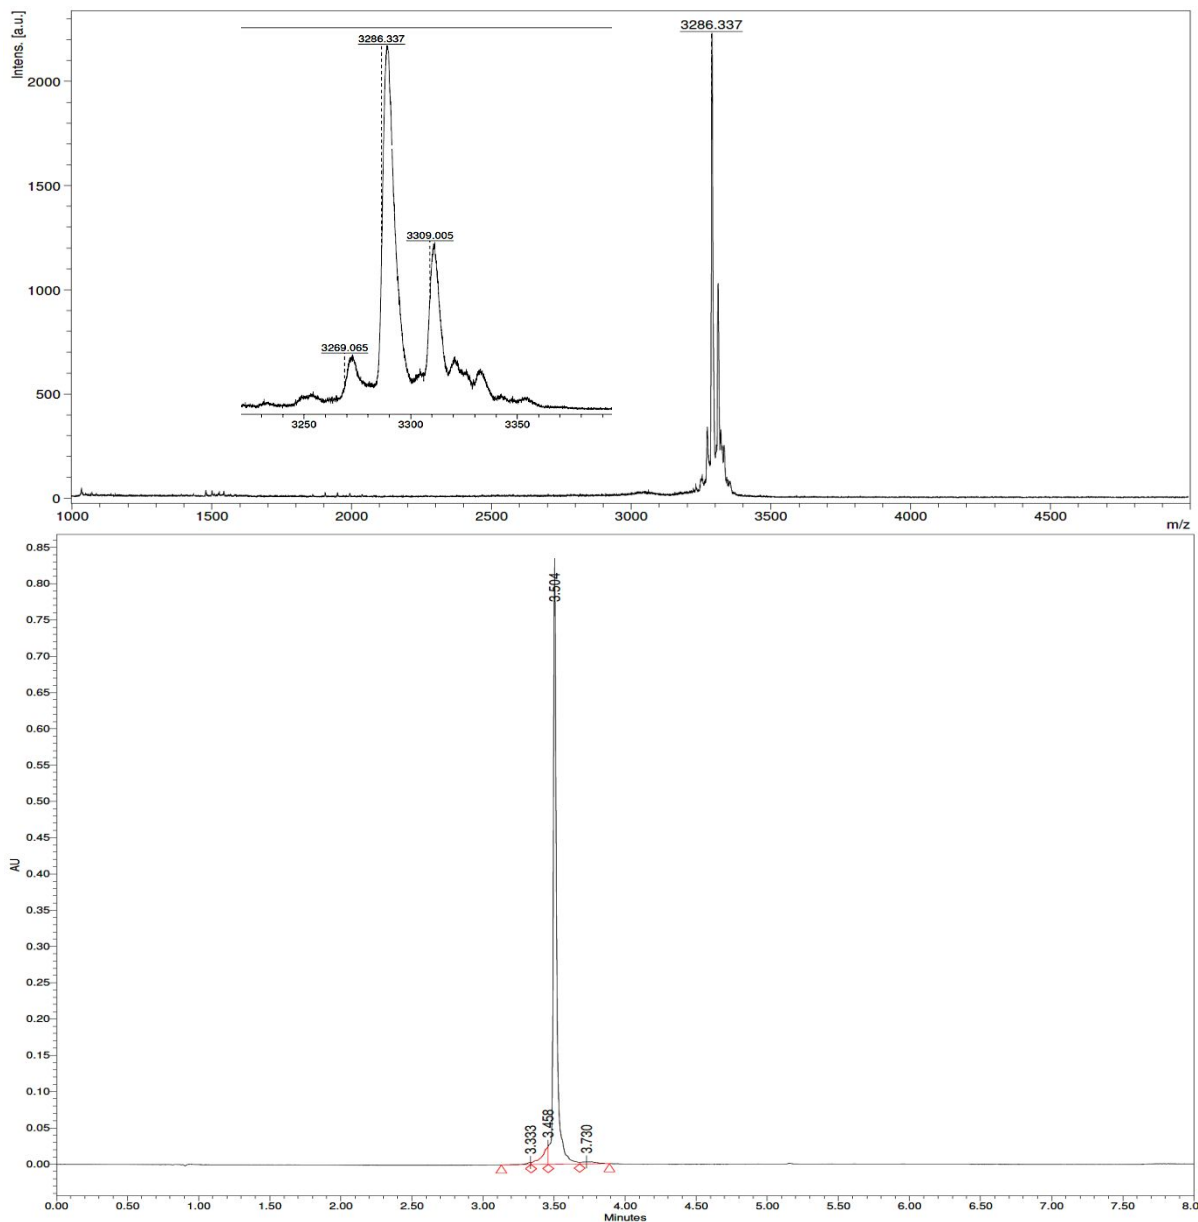

### 1) $\alpha/\beta$ -peptide 1: XLGWCIGEUGTDPNLNHUQFRUKILZCWX-NH<sub>2</sub>

MALDI-TOF-MS (m/z): calculated monoisotopic  $[M+H]^+ = 3287.693$ ,  $[M+Na]^+ = 3309.675$   
observed monoisotopic  $[M+H]^+ = 3286.337$ ,  $[M+Na]^+ = 3309.005$   
(-16 m/z peak may correspond to aspartimide formation)

UPLC: H<sub>2</sub>O/MeCN + 0.1% TFA, 10-95% MeCN, 5 min, 0.3 mL/min on a BEH C18 (1.7  $\mu$ m, 2.1 x 50 mm) column  
Purity = 93.73%

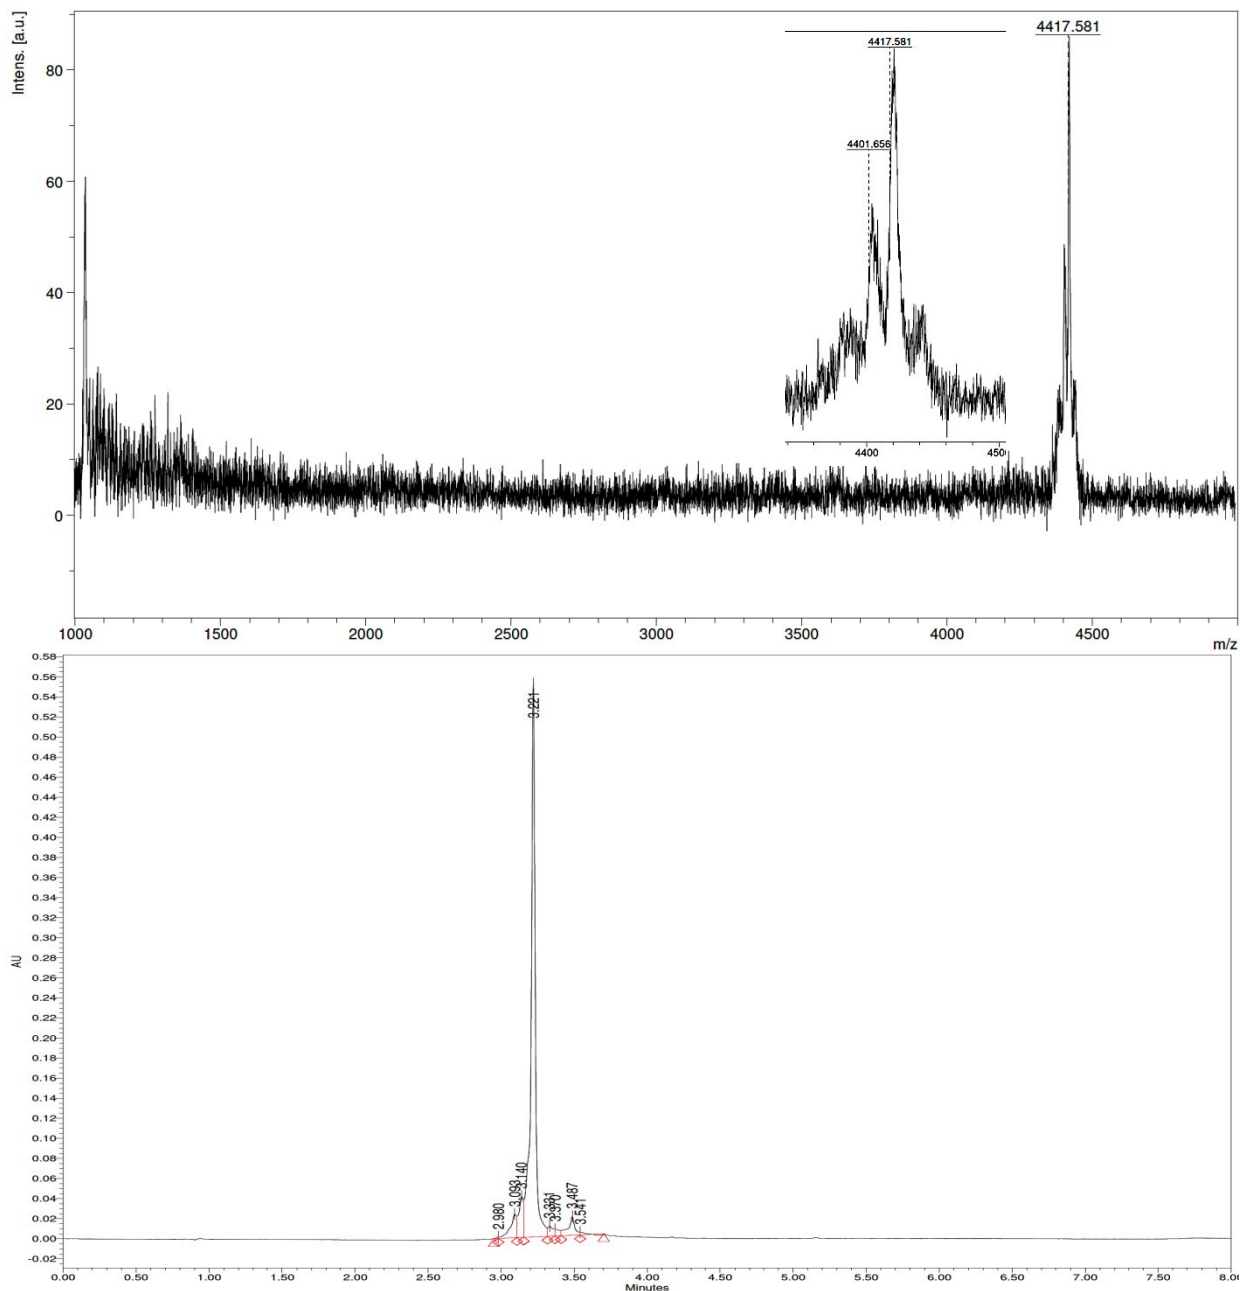

**2)  $\alpha$ -peptide 2: VDNKFNKECGWRIGEGTDPNLNHQQFRAKILSIWDDC-NH<sub>2</sub>**

**MALDI-TOF-MS (m/z):** calculated monoisotopic  $[M+H]^+ = 4415.125$   
observed monoisotopic  $[M+H]^+ = 4417.581$   
-16 m/z peak may correspond to aspartimide formation

**UPLC:** H<sub>2</sub>O/MeCN + 0.1% TFA, 10-95% MeCN, 5 min, 0.3 mL/min on a BEH C18 (1.7  $\mu$ m, 2.1 x 50 mm) column  
Purity = 80.81%

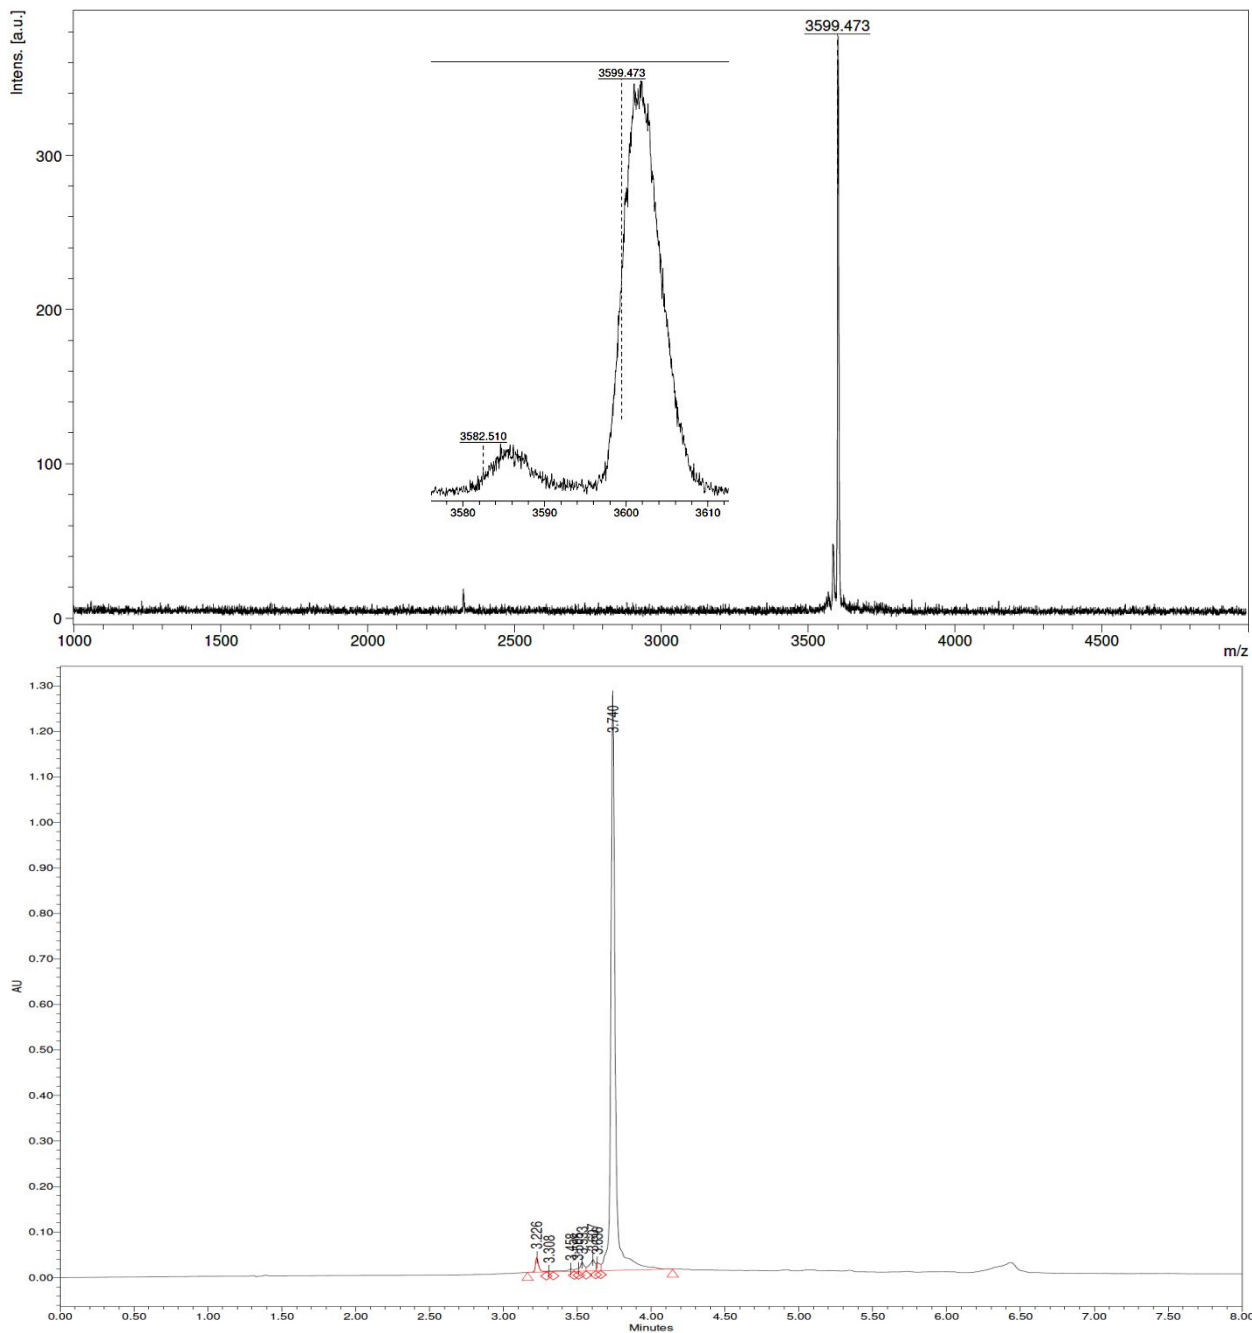

**3)  $\alpha$ -peptide 3: ECGWRIGEAGTDPNLNHQQFRAKILSIWEEC-NH<sub>2</sub>**

MALDI-TOF-MS (m/z): calculated monoisotopic  $[M+H]^+ = 3597.717$   
 observed monoisotopic  $[M+H]^+ = 3599.473$   
 -16 m/z peak may correspond to N-terminal pyroglutamate formation or loss  
 of sidechain amine

UPLC: H<sub>2</sub>O/MeCN + 0.1% TFA, 10-95% MeCN, 5 min, 0.3 mL/min on a BEH C18 (1.7  $\mu$ m, 2.1  
 x 50 mm) column  
 Purity = 92.30%

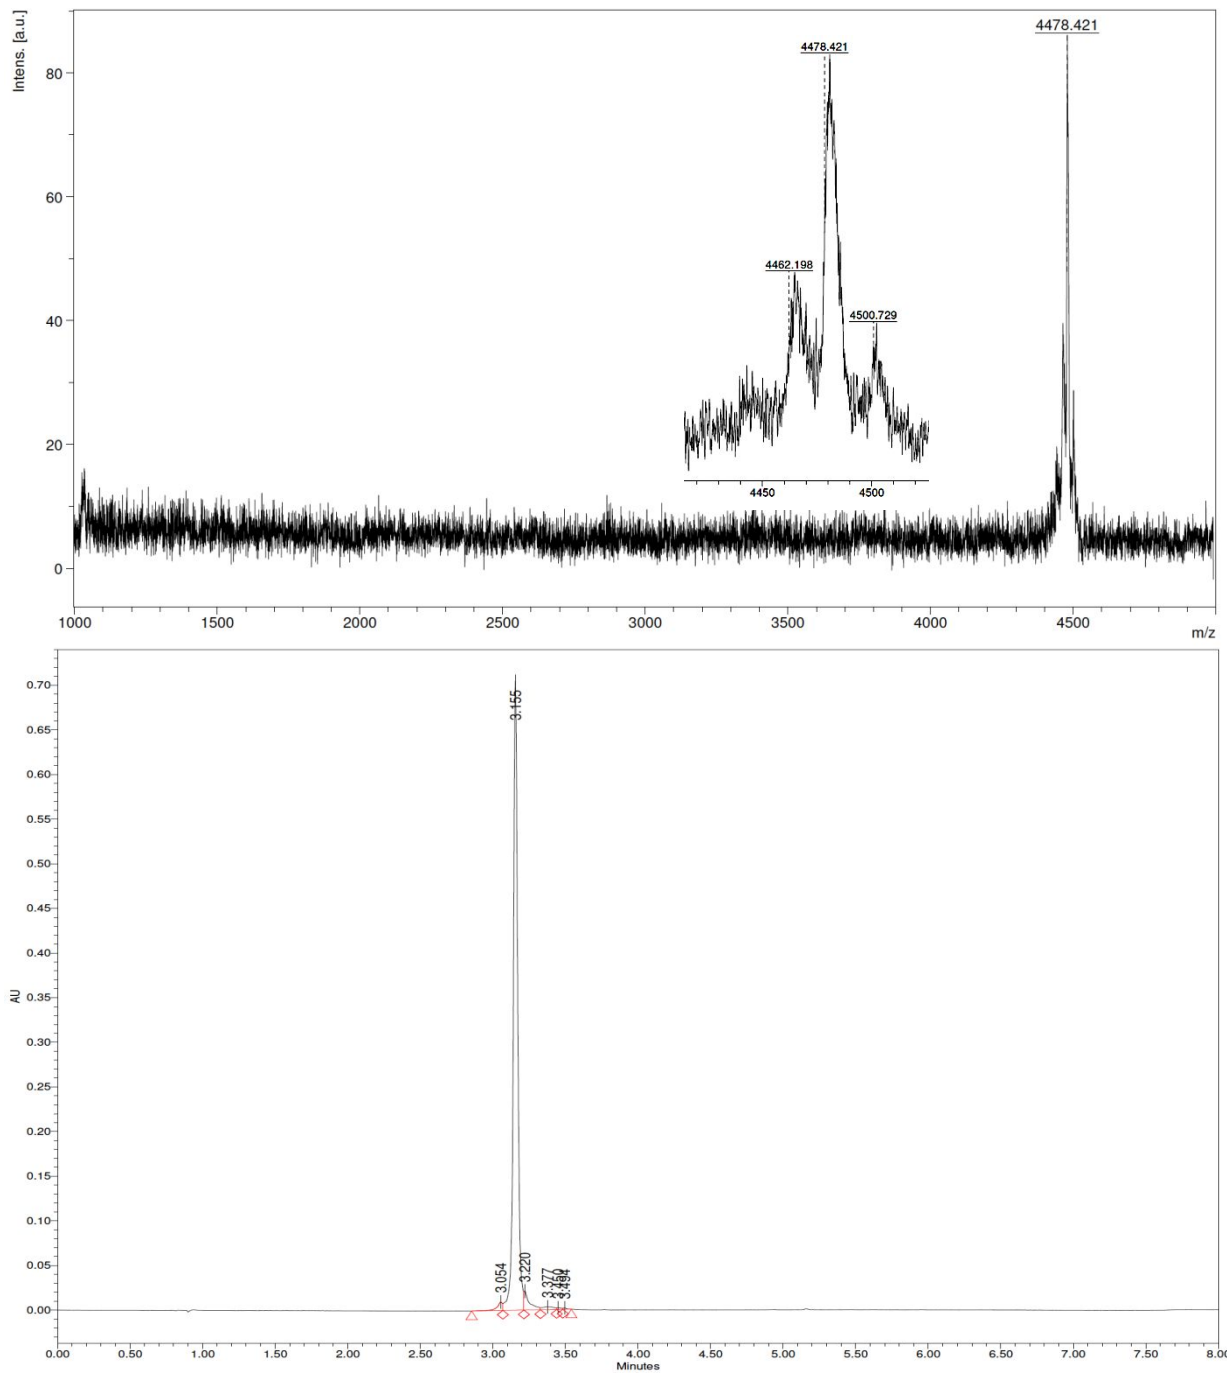

**4)  $\alpha/\beta$ -peptide 4: VDNKFNKXCGWRIGEUGTDPNLNHQQFRUKILZIWXDC-NH<sub>2</sub>**

MALDI-TOF-MS (m/z): calculated monoisotopic [M+H]<sup>+</sup> = 4475.298, [M+Na]<sup>+</sup> = 4497.280  
 observed monoisotopic [M+H]<sup>+</sup> = 4478.421, [M+Na]<sup>+</sup> = 4500.729  
 -16 m/z peak may correspond to aspartimide formation

UPLC: H<sub>2</sub>O/MeCN + 0.1% TFA, 10-95% MeCN, 5 min, 0.3 mL/min on a BEH C18 (1.7  $\mu$ m, 2.1 x 50 mm) column  
 Purity = 93.53%

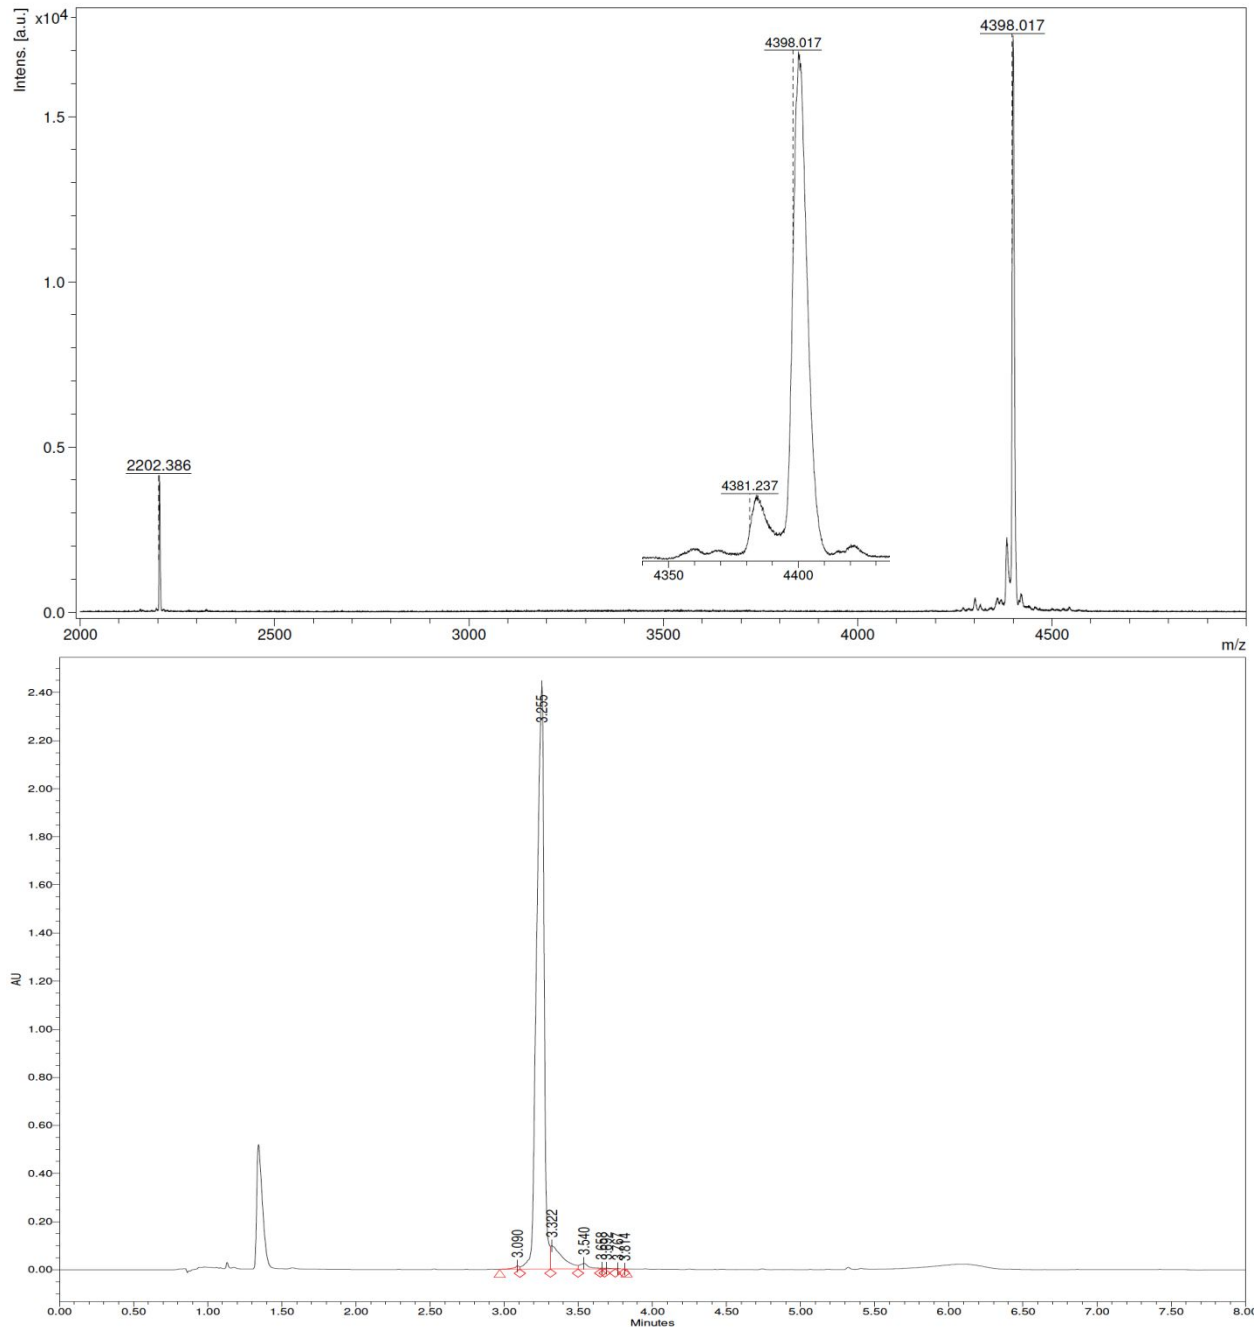

**5)  $\alpha/\beta$ -peptide 5: VDNKFNKXCGZRIGEUGTDPNLNHQQFRUKILZIWXDC-NH<sub>2</sub>**

MALDI-TOF-MS (m/z): calculated monoisotopic  $[M+H]^+ = 4401.287$ ,  $[M+2H]^{2+} = 2201.147$   
 observed monoisotopic  $[M+H]^+ = 4398.017$ ,  $[M+2H]^{2+} = 2202.386$   
 -17 m/z peak may correspond to aspartimide formation

UPLC: H<sub>2</sub>O/MeCN + 0.1% TFA, 10-95% MeCN, 5 min, 0.3 mL/min on a BEH C18 (1.7  $\mu$ m, 2.1 x 50 mm) column  
 Purity = 92.23%

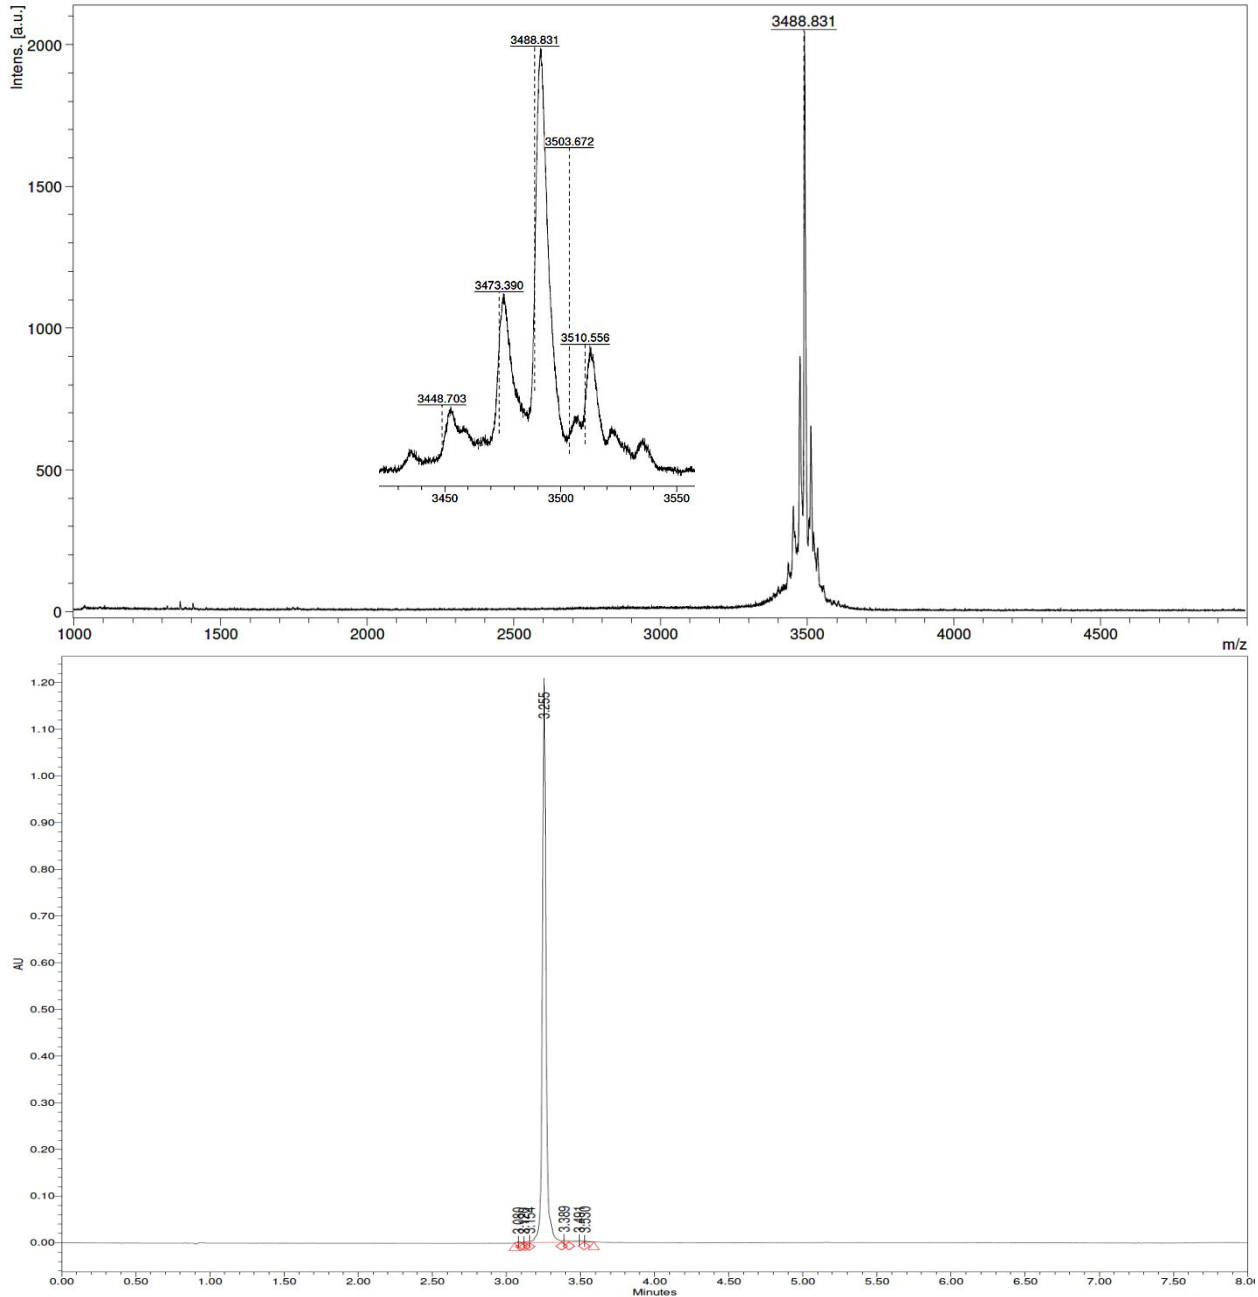

**6)  $\alpha/\beta$ -peptide 6: CGWRIGEUGTDPNLNHQQFRUKILZIWDC-NH<sub>2</sub>**

MALDI-TOF-MS (m/z): calculated monoisotopic  $[M+H]^+ = 3490.690$ ,  $[M+Na]^+ = 3512.672$   
 observed monoisotopic  $[M+H]^+ = 3488.831$ ,  $[M+Na]^+ = 3510.556$   
 -16 m/z peak may correspond to aspartimide formation

UPLC: H<sub>2</sub>O/MeCN + 0.1% TFA, 10-95% MeCN, 5 min, 0.3 mL/min on a BEH C18 (1.7  $\mu$ m, 2.1 x 50 mm) column  
 Purity = 97.99%

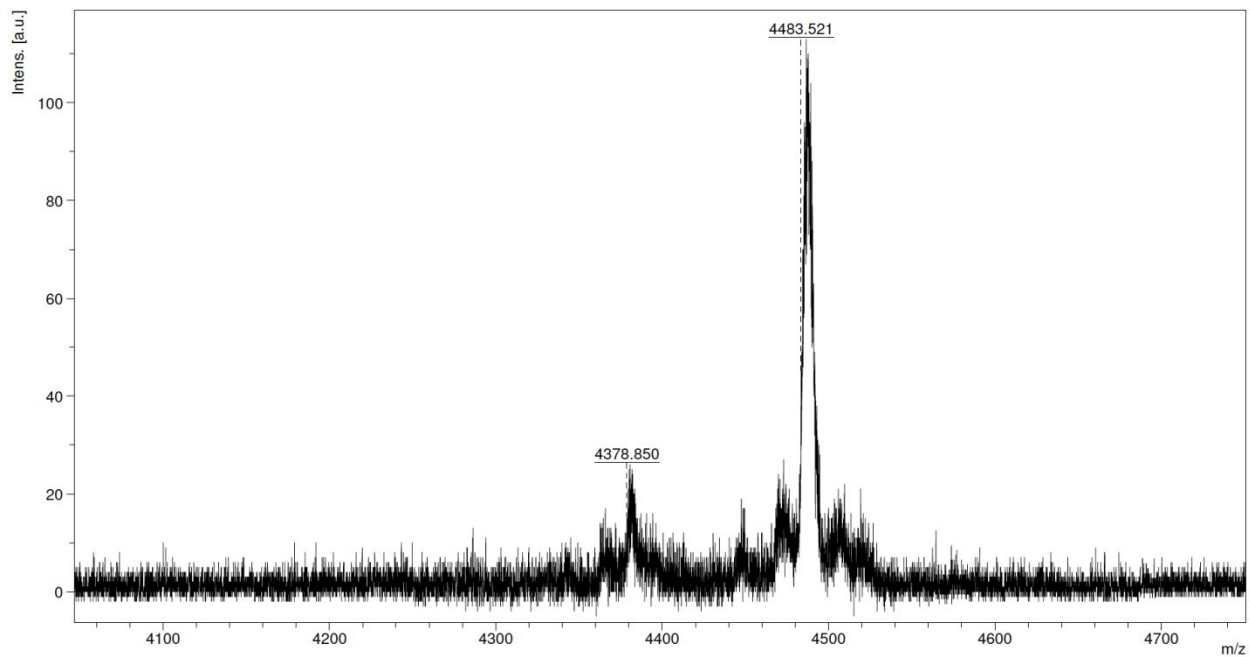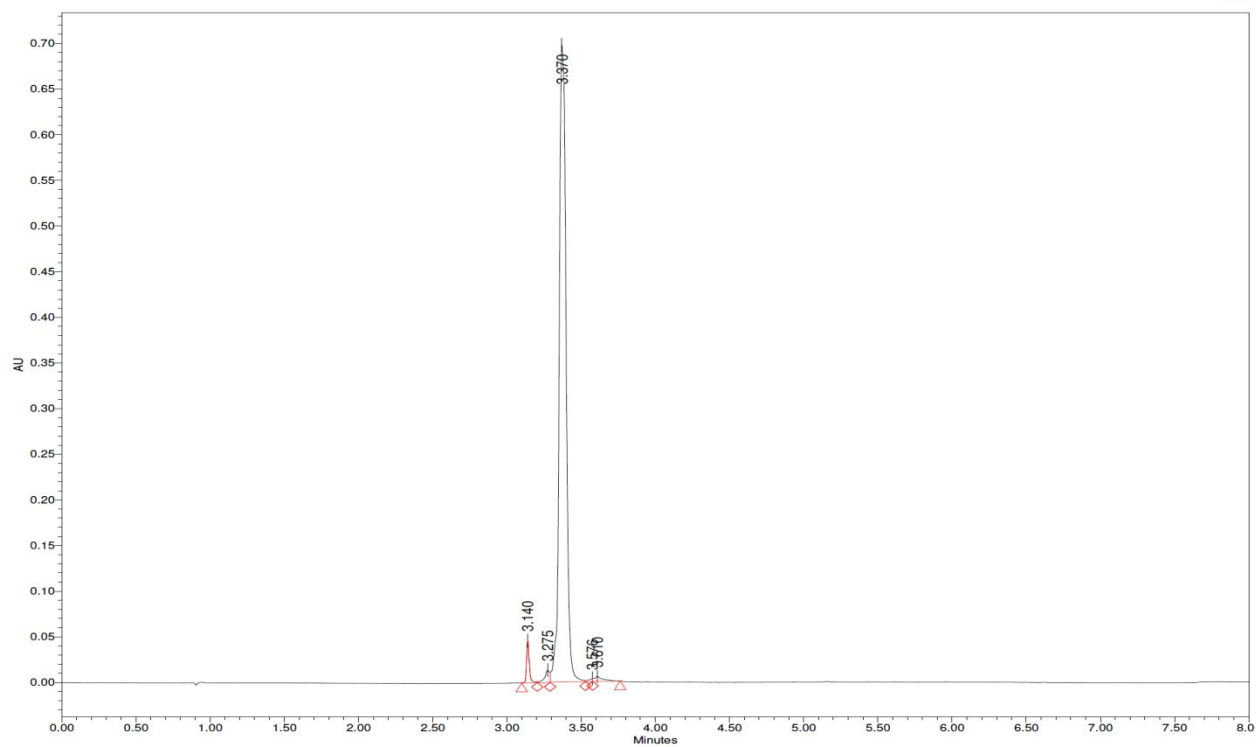

**7)  $\alpha/\beta$ -peptide 7: VDNKFNKXLGWRIGEGTDPNLNHQQFRUKILZIWXDP-NH<sub>2</sub>**

MALDI-TOF-MS (m/z): calculated monoisotopic [M+H]<sup>+</sup> = 4481.301  
 observed monoisotopic [M+H]<sup>+</sup> = 4483.521

UPLC: H<sub>2</sub>O/MeCN + 0.1% TFA, 10-95% MeCN, 5 min, 0.3 mL/min on a BEH C18 (1.7  $\mu$ m, 2.1 x 50 mm) column

Purity = 95.03%



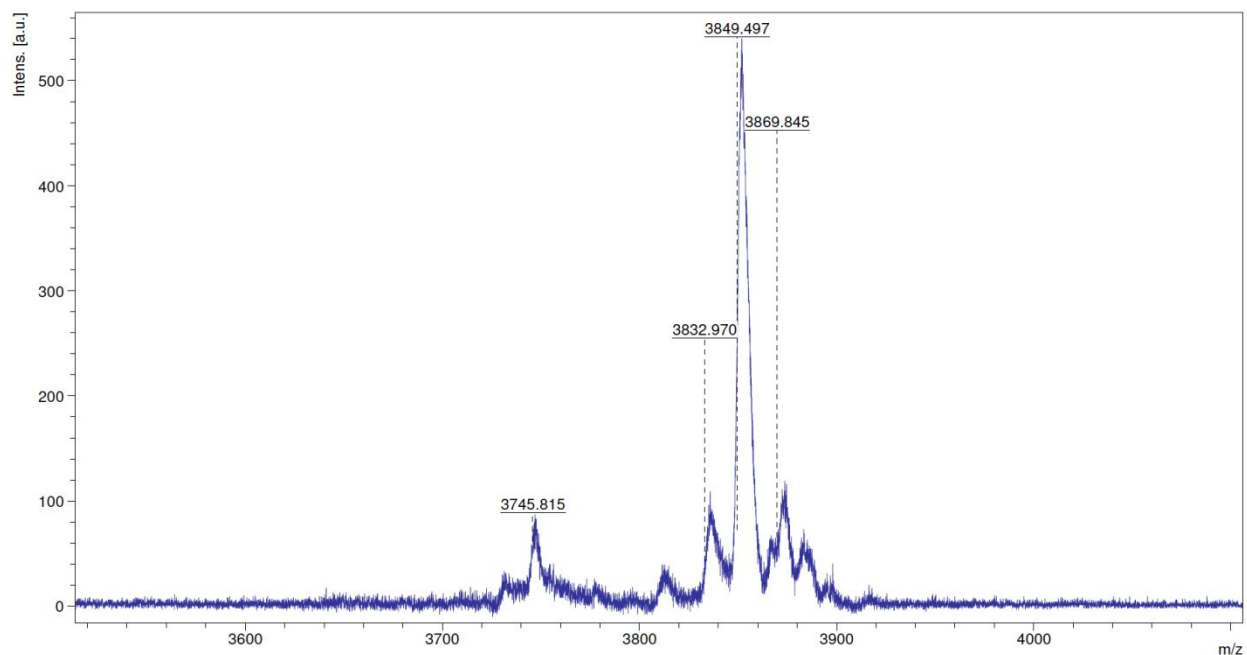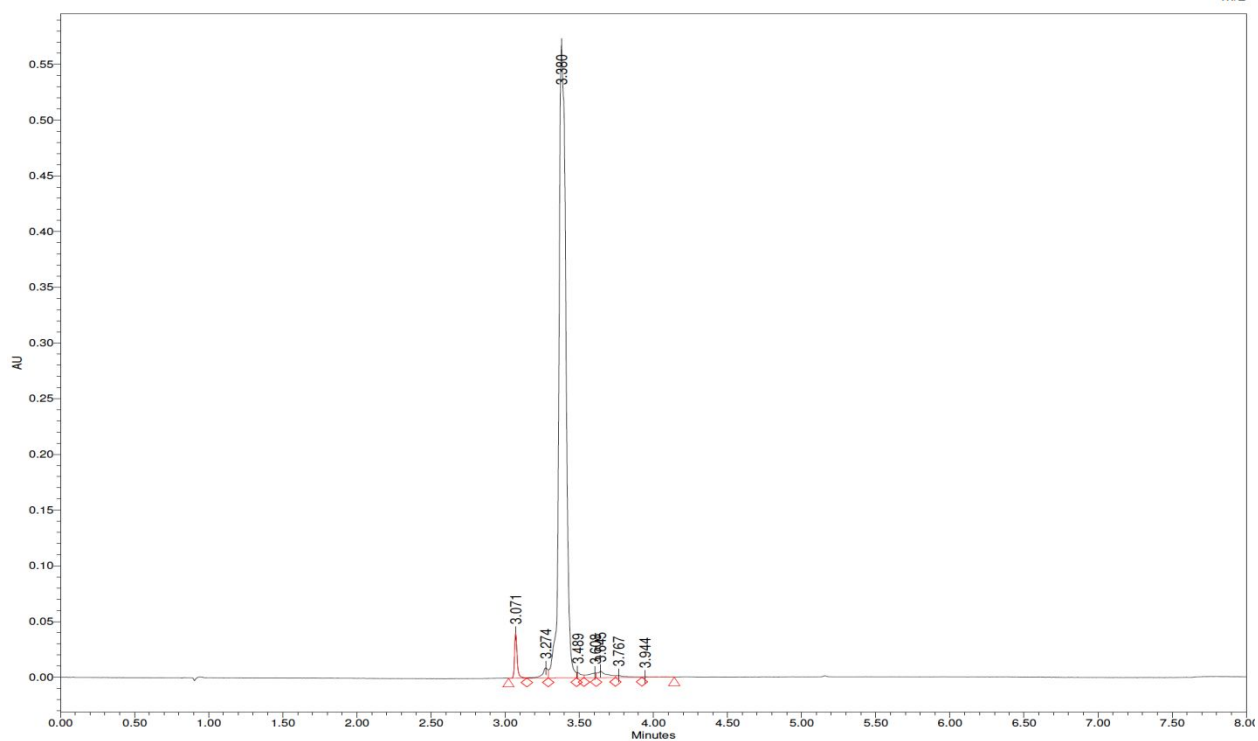

**8)  $\alpha/\beta$ -peptide 8: NKXLGWRIGEUGTDPNLNHQQFRUKILZIWXDP-NH<sub>2</sub>**

MALDI-TOF-MS (m/z): calculated monoisotopic  $[M+H]^+ = 3849.999$ ,  $[M+Na]^+ = 3871.981$   
 observed monoisotopic  $[M+H]^+ = 3849.497$ ,  $[M+Na]^+ = 3869.845$

UPLC: H<sub>2</sub>O/MeCN + 0.1% TFA, 10-95% MeCN, 5 min, 0.3 mL/min on a BEH C18 (1.7  $\mu$ m, 2.1 x 50 mm) column

Purity = 93.16%

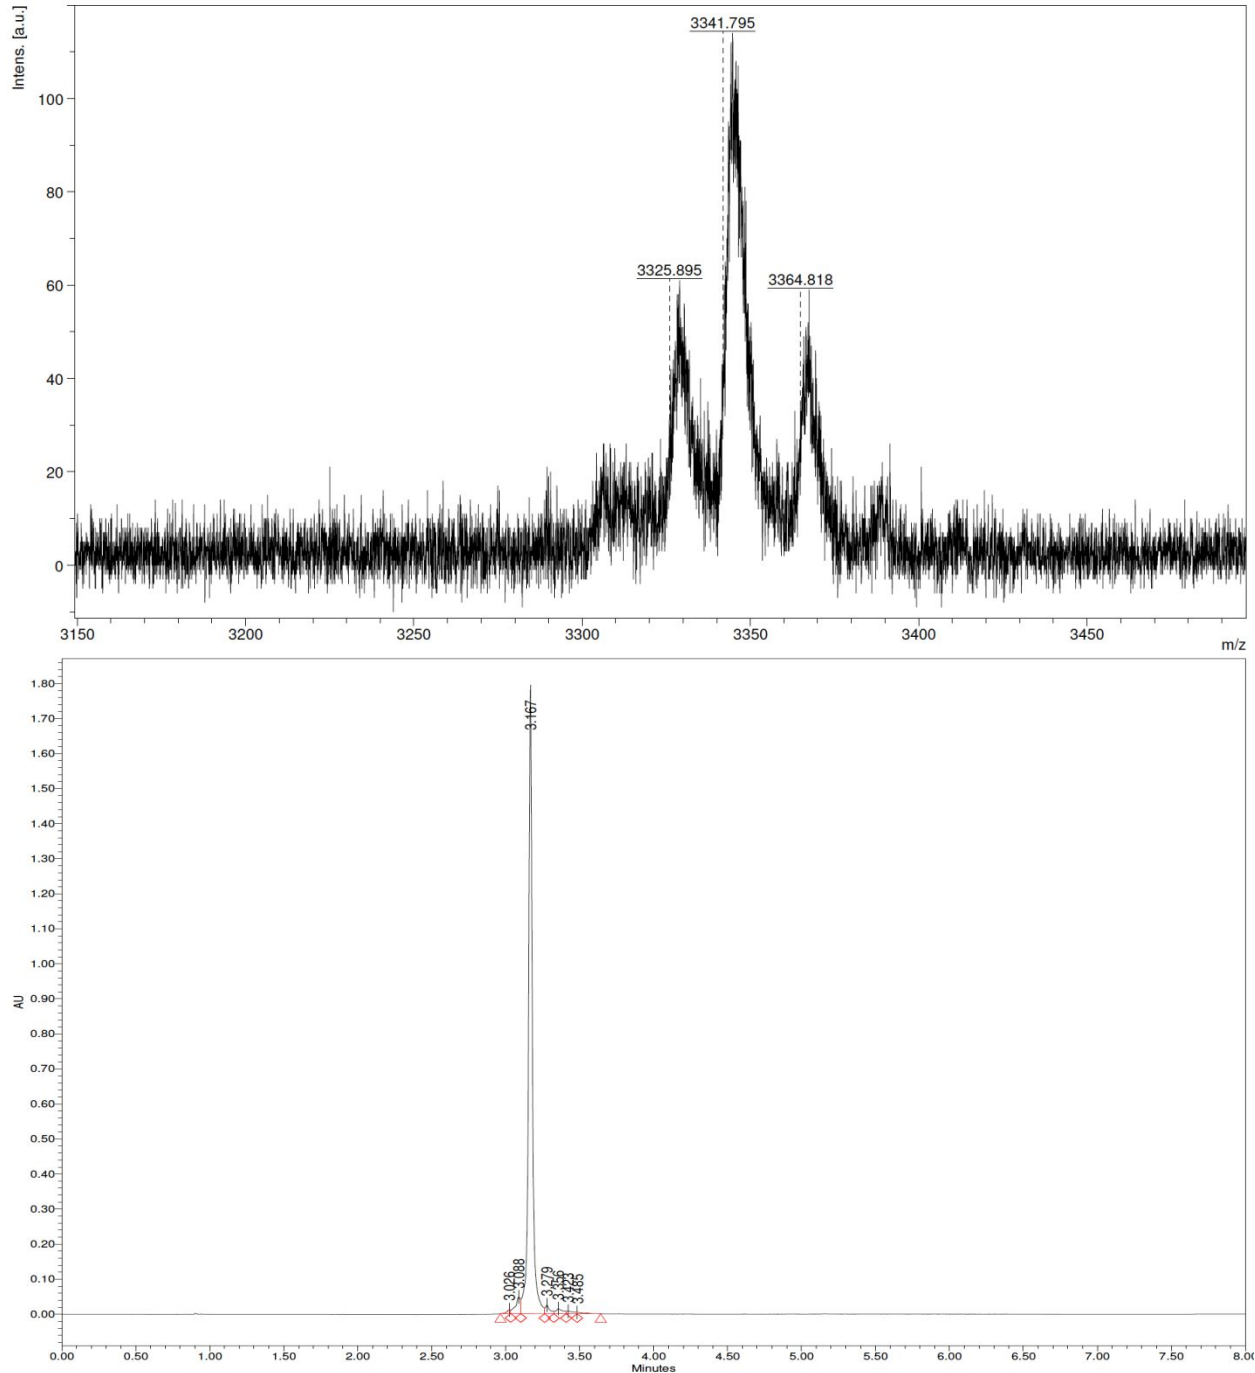

**9)  $\alpha/\beta$ -peptide 9: ECGWRIGEAGTDPNLNHQQFRAKILSCWD-NH<sub>2</sub>**

**MALDI-TOF-MS (m/z):** calculated monoisotopic  $[M+H]^+ = 3341.575$ ,  $[M+Na]^+ = 3363.557$   
 observed monoisotopic  $[M+H]^+ = 3341.795$ ,  $[M+Na]^+ = 3364.818$   
 -16 m/z peak may correspond to N-terminal pyroglutamate formation or Lys  
 side chain loss due to laser irradiation

**UPLC:** H<sub>2</sub>O/MeCN + 0.1% TFA, 10-95% MeCN, 5 min, 0.3 mL/min on a BEH C18 (1.7  $\mu$ m, 2.1 x 50 mm) column  
 Purity = 92.38%

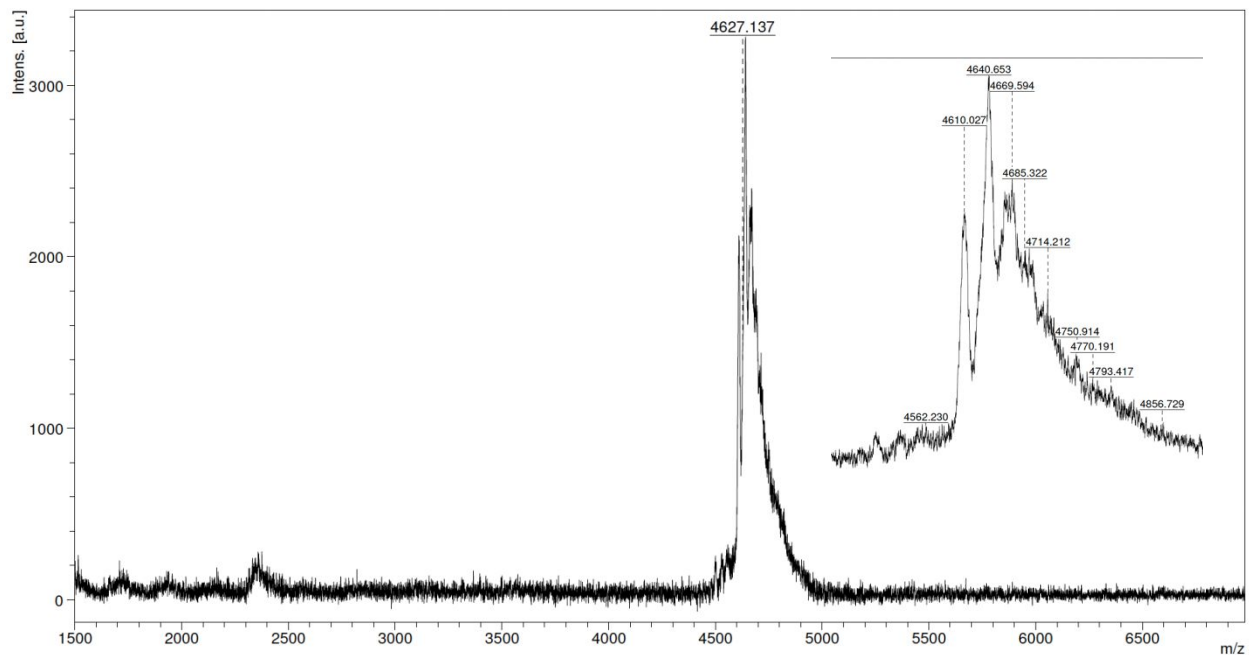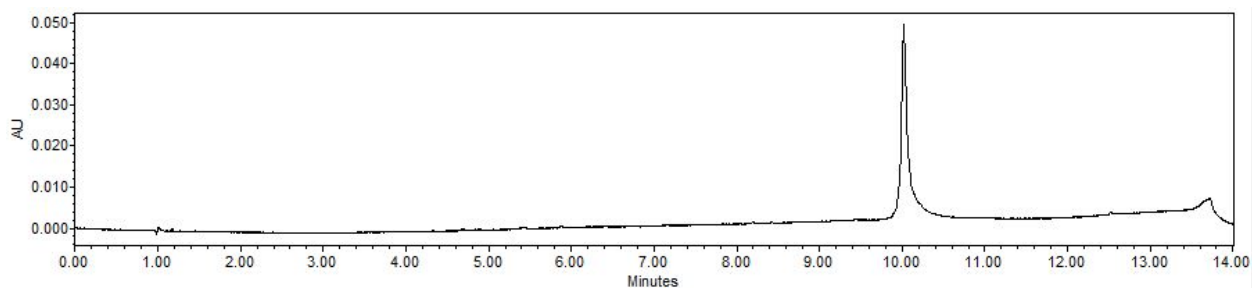

**10) (C<sub>12</sub>)<sub>2</sub>-PEG<sub>16</sub>- $\alpha$ / $\beta$ -peptide 1:**

MALDI-TOF-MS (m/z): calculated monoisotopic [M+H]<sup>+</sup> = 4626.626  
 observed monoisotopic [M+H]<sup>+</sup> = 4627.137  
 -16 m/z peak may correspond to N-terminal pyroglutamate formation or Lys side chain loss due to laser irradiation  
 larger m/z peaks may correspond to salt adducts

UPLC: H<sub>2</sub>O/MeCN + 0.1% TFA, 10-95% MeCN, 5 min, 0.3 mL/min on a BEH C18 (1.7  $\mu$ m, 2.1 x 50 mm) column

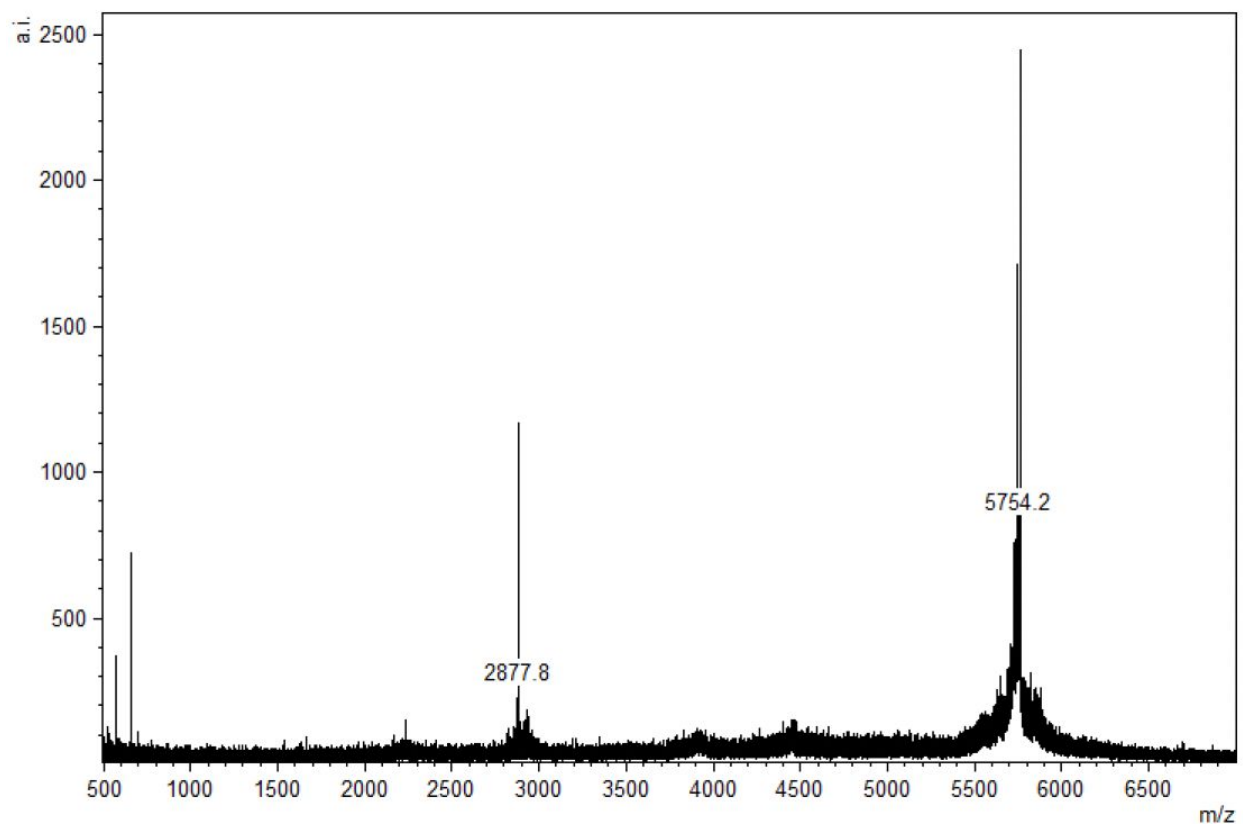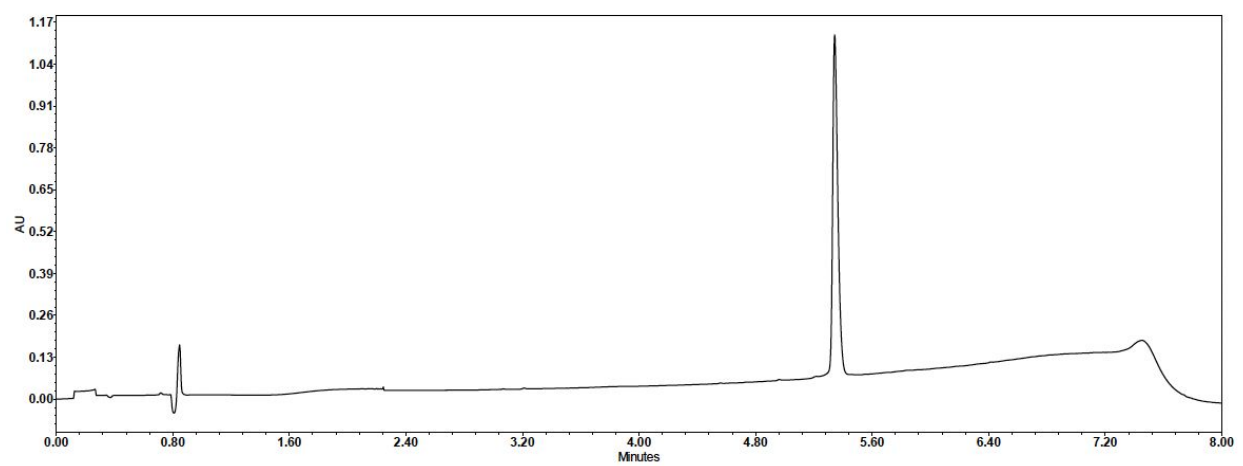

**12) (C<sub>12</sub>)<sub>2</sub>-PEG<sub>16</sub>- $\alpha$ / $\beta$ -peptide 2:**

MALDI-TOF-MS (m/z): calculated monoisotopic [M+H]<sup>+</sup> = 5754.0, [M+2H]<sup>+</sup> = 2877.5  
 observed monoisotopic [M+H]<sup>+</sup> = 5754.2, [M+2H]<sup>+</sup> = 2877.8

UPLC: H<sub>2</sub>O/MeCN + 0.1% TFA, 10-95% MeCN, 5 min, 0.3 mL/min on a BEH C18 (1.7  $\mu$ m, 2.1 x 50 mm) column

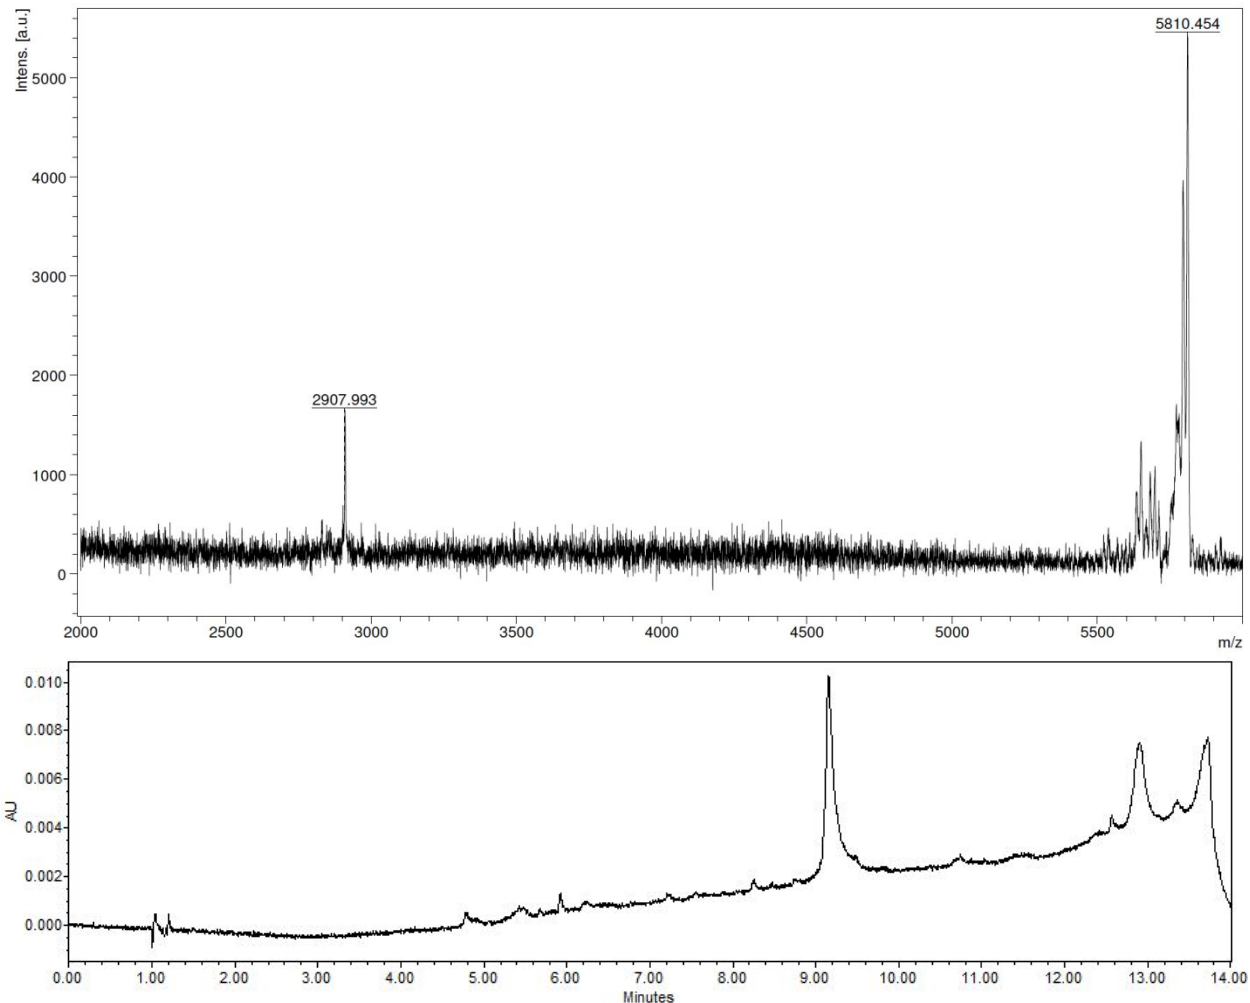

**12) (C<sub>12</sub>)<sub>2</sub>-PEG<sub>16</sub>-α/β-peptide 4:**

MALDI-TOF-MS (m/z): calculated monoisotopic [M+H]<sup>+</sup> = 5814.231, [M+2H]<sup>+</sup> = 2907.619  
 observed monoisotopic [M+H]<sup>+</sup> = 5810.454, [M+2H]<sup>+</sup> = 2907.993  
 smaller m/z peaks may correspond to laser fragmentation, since high laser power was needed for detection

UPLC: H<sub>2</sub>O/MeCN + 0.1% TFA, 10-95% MeCN, 5 min, 0.3 mL/min on a BEH C18 (1.7 μm, 2.1 x 50 mm) column

The peaks eluted at 13 and 14 minutes are aggregated peptide washed off from the column.

## V. References:

- (1) Lee, H. S.; Leplae, P. R.; Porter, E. A.; Gellman, S. H. An Efficient Route to Either Enantiomer of Orthogonally Protected Trans-3-Aminopyrrolidine-4-Carboxylic Acid. *J. Org. Chem.* **2001**, *66* (10), 3597–3599. <https://doi.org/10.1021/jo001534l>.
- (2) Gill, S. C.; von Hippel, P. H. Calculation of Protein Extinction Coefficients from Amino Acid Sequence Data. *Analytical Biochemistry*. 1989, pp 319–326. [https://doi.org/10.1016/0003-2697\(89\)90602-7](https://doi.org/10.1016/0003-2697(89)90602-7).
- (3) Raran-Kurussi, S.; Cherry, S.; Zhang, D.; Waugh, D. S. Chapter 14 Removal of Affinity Tags with TEV Protease. *Methods Mol. Biol.* **1586**. [https://doi.org/10.1007/978-1-4939-6887-9\\_14](https://doi.org/10.1007/978-1-4939-6887-9_14).
- (4) Kabsch, W. Integration, Scaling, Space-Group Assignment and Post-Refinement. *Acta Crystallogr. Sect. D Biol. Crystallogr.* **2010**, *66* (2), 133–144. <https://doi.org/10.1107/S0907444909047374>.
- (5) Vonrhein, C.; Flensburg, C.; Keller, P.; Sharff, A.; Smart, O.; Paciorek, W.; Womack, T.; Bricogne, G. Data Processing and Analysis with the AutoPROC Toolbox. *Acta Crystallogr. Sect. D Biol. Crystallogr.* **2011**, *67* (4), 293–302. <https://doi.org/10.1107/S0907444911007773>.
- (6) Liebschner, D.; Afonine, P. V.; Baker, M. L.; Bunkóczi, G.; Chen, V. B.; Croll, T. I.; Hintze, B.; Hung, L.-W.; Jain, S.; McCoy, A. J.; et al. Macromolecular Structure Determination Using X-Rays, Neutrons and Electrons: Recent Developments in Phenix. *urn:issn:2059-7983* **2019**, *75* (10), 861–877. <https://doi.org/10.1107/S2059798319011471>.
- (7) McCoy, A. J.; Grosse-Kunstleve, R. W.; Adams, P. D.; Winn, M. D.; Storoni, L. C.; Read, R. J.; IUCr. Phaser Crystallographic Software. *urn:issn:0021-8898* **2007**, *40* (4), 658–674. <https://doi.org/10.1107/S0021889807021206>.
- (8) Eck, M. J.; Sprang, S. R. The Structure of Tumor Necrosis Factor- $\alpha$  at 2.6 Å Resolution. Implications for Receptor Binding. *J. Biol. Chem.* **1989**, *264* (29), 17595–17605. <https://doi.org/10.2210/pdb1tnf/pdb>.
- (9) Kantardjieff, K. A.; Rupp, B.; Keck, W. M. Matthews Coefficient Probabilities: Improved Estimates for Unit Cell Contents of Proteins, DNA, and Protein-Nucleic Acid Complex Crystals. *Protein Sci.* **2003**, *12*, 1865–1871. <https://doi.org/10.1110/ps.0350503>.
- (10) Matthews, B. W. Solvent Content of Protein Crystals. *J. Mol. Biol.* **1968**, *33* (2), 491–497. [https://doi.org/10.1016/0022-2836\(68\)90205-2](https://doi.org/10.1016/0022-2836(68)90205-2).
- (11) Emsley, P.; Lohkamp, B.; Scott, W. G.; Cowtan, K. Features and Development of Coot. *urn:issn:0907-4449* **2010**, *66* (4), 486–501. <https://doi.org/10.1107/S0907444910007493>.
- (12) Moriarty, N. W.; Grosse-Kunstleve, R. W.; Adams, P. D.; IUCr. Electronic Ligand Builder and Optimization Workbench (ELBOW): A Tool for Ligand Coordinate and Restraint Generation. *urn:issn:0907-4449* **2009**, *65* (10), 1074–1080. <https://doi.org/10.1107/S0907444909029436>.
- (13) Checco, J. W.; Eddinger, G. A.; Rettko, N. J.; Chartier, A. R.; Gellman, S. H. Tumor Necrosis Factor- $\alpha$  Trimer Disassembly and Inactivation via Peptide-Small Molecule Synergy. *ACS Chem. Biol.* **2020**, *15* (8), 2116–2124. <https://doi.org/10.1021/acscchembio.0c00313>.
- (14) Luzi, S.; Kondo, Y.; Bernard, E.; Stadler, L. K. J.; Vaysburd, M.; Winter, G.; Holliger, P. Subunit Disassembly and Inhibition of TNF $\alpha$  by a Semi-Synthetic Bicyclic Peptide.

- Protein Eng. Des. Sel.* **2015**, 28 (2), 45–52. <https://doi.org/10.1093/protein/gzu055>.
- (15) Jonsson, A.; Wällberg, H.; Herne, N.; Ståhl, S.; Frejd, F. Y. Generation of Tumour-Necrosis-Factor- $\alpha$ -Specific Affibody Molecules Capable of Blocking Receptor Binding in Vitro. *Biotechnol. Appl. Biochem.* **2009**, 54 (2), 93–103. <https://doi.org/10.1042/ba20090085>.
